# Supplementary material for: Tuberculosis notifications in regional Victoria, Australia: Implications for public health care in a low incidence setting
Source: PubMed Central journal article supplement (PMC10030020; doi:10.1371/journal.pone.0282884), 2023-03-21
Supplement: pone.0282884.s004.pdf [file pone.0282884.s004.pdf]

# PLOS ONE

## Tuberculosis notifications in regional Victoria, Australia: implications for public health care in a low incidence setting --Manuscript Draft--

|                               |                                                                                                                                                                                                                                                                                                                                                                                                                                                                                                                                                                                                                                                                                                                                                                                                                                                                                                                                                                                                                                                                                                                                                                                                                                                                                                                                                                                                                                                                                                                                                                                                                                                                                                                                                                                                                                                                                                                                                                                                                                                                                                                                                  |
|-------------------------------|--------------------------------------------------------------------------------------------------------------------------------------------------------------------------------------------------------------------------------------------------------------------------------------------------------------------------------------------------------------------------------------------------------------------------------------------------------------------------------------------------------------------------------------------------------------------------------------------------------------------------------------------------------------------------------------------------------------------------------------------------------------------------------------------------------------------------------------------------------------------------------------------------------------------------------------------------------------------------------------------------------------------------------------------------------------------------------------------------------------------------------------------------------------------------------------------------------------------------------------------------------------------------------------------------------------------------------------------------------------------------------------------------------------------------------------------------------------------------------------------------------------------------------------------------------------------------------------------------------------------------------------------------------------------------------------------------------------------------------------------------------------------------------------------------------------------------------------------------------------------------------------------------------------------------------------------------------------------------------------------------------------------------------------------------------------------------------------------------------------------------------------------------|
| <b>Manuscript Number:</b>     | PONE-D-22-00893R2                                                                                                                                                                                                                                                                                                                                                                                                                                                                                                                                                                                                                                                                                                                                                                                                                                                                                                                                                                                                                                                                                                                                                                                                                                                                                                                                                                                                                                                                                                                                                                                                                                                                                                                                                                                                                                                                                                                                                                                                                                                                                                                                |
| <b>Article Type:</b>          | Research Article                                                                                                                                                                                                                                                                                                                                                                                                                                                                                                                                                                                                                                                                                                                                                                                                                                                                                                                                                                                                                                                                                                                                                                                                                                                                                                                                                                                                                                                                                                                                                                                                                                                                                                                                                                                                                                                                                                                                                                                                                                                                                                                                 |
| <b>Full Title:</b>            | Tuberculosis notifications in regional Victoria, Australia: implications for public health care in a low incidence setting                                                                                                                                                                                                                                                                                                                                                                                                                                                                                                                                                                                                                                                                                                                                                                                                                                                                                                                                                                                                                                                                                                                                                                                                                                                                                                                                                                                                                                                                                                                                                                                                                                                                                                                                                                                                                                                                                                                                                                                                                       |
| <b>Short Title:</b>           | Tuberculosis in regional Victoria                                                                                                                                                                                                                                                                                                                                                                                                                                                                                                                                                                                                                                                                                                                                                                                                                                                                                                                                                                                                                                                                                                                                                                                                                                                                                                                                                                                                                                                                                                                                                                                                                                                                                                                                                                                                                                                                                                                                                                                                                                                                                                                |
| <b>Corresponding Author:</b>  | Nompilo Moyo, PhD Candidate<br>La Trobe University - Bundoora Campus: La Trobe University<br>Bundoora, Victoria AUSTRALIA                                                                                                                                                                                                                                                                                                                                                                                                                                                                                                                                                                                                                                                                                                                                                                                                                                                                                                                                                                                                                                                                                                                                                                                                                                                                                                                                                                                                                                                                                                                                                                                                                                                                                                                                                                                                                                                                                                                                                                                                                        |
| <b>Keywords:</b>              | Keywords: regional, metropolitan, tuberculosis, treatment completion, delayed diagnosis                                                                                                                                                                                                                                                                                                                                                                                                                                                                                                                                                                                                                                                                                                                                                                                                                                                                                                                                                                                                                                                                                                                                                                                                                                                                                                                                                                                                                                                                                                                                                                                                                                                                                                                                                                                                                                                                                                                                                                                                                                                          |
| <b>Abstract:</b>              | <p>Background: Regionality is often a significant factor in tuberculosis (TB) management and outcomes worldwide. A wide range of context-specific factors may influence these differences and change over time. We compared TB treatment in regional and metropolitan areas, considering demographic and temporal trends affecting TB diagnosis and outcomes. Methods: Retrospective analyses of data for patients notified with TB in Victoria, Australia, were conducted. The study outcomes were treatment delays and treatment outcomes. Multivariable Cox proportional hazard model analyses were performed to investigate the effect of regionality in the management of TB. Six hundred and eleven (7%) TB patients were notified in regional and 8,163 (93%) in metropolitan areas between 1995 and 2019. Of the 611 cases in the regional cohort, 401 (66%) were overseas-born. Fifty-one percent of the overseas-born patients in regional Victoria developed TB disease within five years of arrival in Australia. Four cases of multidrug-resistant tuberculosis were reported in regional areas, compared to 97 cases in metropolitan areas. A total of 3,238 patients notified from 2012 to 2019 were included in the survival analysis. Patient follow-up was censored at the first visit to the health care facility (Patient treatment delay) and at the initiation of TB treatment (Health system delay). Patient, health system, and treatment delays were similar in regional and metropolitan areas for cases with pulmonary involvement. Cases with extrapulmonary TB in regional areas have a non-significantly longer healthcare system delay than patients in metropolitan (median 64 days versus 54 days, AHR = 0.8, 95% CI 0.6-1.0, P = 0.094).</p> <p>Conclusion: Tuberculosis in regional Victoria is common among the overseas-born population, and patients with extrapulmonary TB in regional areas experienced a non-significant minor delay in treatment commencement with no apparent detriment to treatment outcomes. Improving access to LTBI management in regional areas may reduce the burden of TB.</p> |
| <b>Order of Authors:</b>      | <p>Nompilo Moyo, PhD Candidate</p> <p>Ee Laine T Tay</p> <p>James Trauer</p> <p>Leona Burke</p> <p>Justin Jackson</p> <p>Robert Commons</p> <p>Sarah Boyd</p> <p>Kasha Singh</p> <p>Justin Denholm</p>                                                                                                                                                                                                                                                                                                                                                                                                                                                                                                                                                                                                                                                                                                                                                                                                                                                                                                                                                                                                                                                                                                                                                                                                                                                                                                                                                                                                                                                                                                                                                                                                                                                                                                                                                                                                                                                                                                                                           |
| <b>Response to Reviewers:</b> | Tuberculosis notifications in regional Victoria, Australia: implications for public health care in a low incidence setting                                                                                                                                                                                                                                                                                                                                                                                                                                                                                                                                                                                                                                                                                                                                                                                                                                                                                                                                                                                                                                                                                                                                                                                                                                                                                                                                                                                                                                                                                                                                                                                                                                                                                                                                                                                                                                                                                                                                                                                                                       |

#### Response to reviewer 2

Your feedback 1. The Methods section still requires revisions. Currently there are sub-sections which are not properly described. For example, the study design sub-section is just one short sentence. I suggest revising this section to include the following sub-sections in this particular order: Data Source, Study Population, Variables, and Statistical Analysis. Under the Data Source sub-section - describe the data source, study design and study setting. Under Study Population sub-section - describe the target population by age, inclusion and exclusion criteria and missing data. Under the Variables sub-section - describe the variables, dependent and independent variables. Under Statistical Analysis sub-section - describe the analyses conducted in the study.

Our response. We have organised the methods section under the suggested sub-sections. See revised lines 99 to 167.

#### Response to reviewer 3

Your feedback 1: Lines 30-32: the methods section of the abstract is quite brief missing important details that will help readers to understand the results presented from a survival analysis. Sample size, follow-up, date variables, outcomes, censoring, and statistical analysis issues are missing.

Our response. We have amended the abstract, and it now reads, "Background: Regionality is often a significant factor in tuberculosis (TB) management and outcomes worldwide. A wide range of context-specific factors may influence these differences and change over time. We compared TB treatment in regional and metropolitan areas, considering demographic and temporal trends affecting TB diagnosis and outcomes. Methods: Retrospective analyses of data for patients notified with TB in Victoria, Australia, were conducted. The outcomes were treatment delays and treatment outcomes. Multivariable Cox proportional hazard model analyses were performed to investigate the effect of regionality in the management of TB. Six hundred and eleven (7%) TB patients were notified in regional and 8,163 (93%) in metropolitan areas between 1995 and 2019. Of the 611 cases in the regional cohort, 401 (66%) were overseas-born. Fifty-one percent of the overseas-born patients in regional Victoria developed TB disease within five years of arrival in Australia. Four cases of multidrug-resistant tuberculosis were reported in regional areas, compared to 97 cases in metropolitan areas. A total of 3,238 patients notified from 2012 to 2019 were included in the survival analysis. Patient follow-up was censored at the first visit to the health care facility (Patient treatment delay) and at the initiation of TB treatment (Health system delay). Patient, health system, and treatment delays were similar in regional and metropolitan areas for cases with pulmonary involvement. Cases with extrapulmonary TB in regional areas have a non-significantly longer healthcare system delay than patients in metropolitan (median 64 days versus 54 days, AHR = 0.8, 95% CI 0.6-1.0, P = 0.094).

Conclusion: Tuberculosis in regional Victoria is common among the overseas-born population, and patients with extrapulmonary TB in regional areas experienced a non-significant minor delay in treatment commencement with no apparent detriment to treatment outcomes. Improving access to LTBI management in regional areas may reduce the burden of TB." Lines 26-49.

Your feedback 2. Line 36-39-->the statement in these lines feels like labeling. In the absence of adequate number of cases, it is difficult to associate multidrug resistant TB and being overseas born. Furthermore, a statement in line 36 reads, 'the proportion of MDR-TB cases in regional vs metropolitan areas is similar'. In the next line, however, it presents only four cases of MDR-TB in regional vs 97 in metropolitan. The statements in the lines indicated above are difficult to followpresent them consistently in terms of proportion or in absolute numbers. The data presented in Table 1 of the body of the document, do not support this statement. 4 MDR-TB vs 0 in regional and metropolitan--> this data is not adequately powered to support the statement provided in these lines.

Our response. We have amended the statement and it now reads "Four cases of multidrug-resistant tuberculosis were reported in regional areas, compared to 97 cases in metropolitan areas." Lines 37-38.

Your feedback 3. Lines 40-44: "Cases with extra pulmonary TB in regional areas have a non-significantly longer healthcare system delay than patients in metropolitan

(median 64 days versus 54 days, AHR = 0.8, 95% CI 0.6-1.0, P = 0.094). People living in regional areas have a non-significantly higher odds of dying of TB (AOR = 1.8, 95% CI 0.7-4.2, P = 0.198)."

In the above text, the authors presented mixed effect sizes, AHR vs AOR. However, the effect estimate from the Cox proportional hazards region is expressed in HRs than ORs. The other thing is that the authors should clearly specify their outcome of interest than generally providing 'TB mgt. outcome'.

Our response. We have amended the abstract, please refer to our response 1. Lines 26-49.

Your feedback 4. The other thing is that the authors should clearly specify their outcome of interest than generally providing 'TB mgt. outcome'.

Our response. We have added the following statement to the abstract and methods sections: "The study outcomes were treatment delays and treatment outcomes". Lines 31, 144-145.

Your feedback 5. While information presented in the background is critical to understand context of the problem, its nature, efforts to reduce the extent of the problem, challenges, gaps, and the need to conduct the current study, it is only presented in 18 lines missing important details. Therefore, i suggest the authors to consider adding a few details to give insight to the problem studied.

Our response. Thank you for this suggestion. We have added the following statement: "Understanding TB treatment delays among regional patients provides important insights into Victorian TB programme performance and is a critical step towards tuberculosis elimination. Globally, TB surveillance data have been recognised as an important data source for assessing the disease burden and epidemiological trends in TB (World Health Organization, 2022). Evaluating treatment outcomes and delays in regional areas will inform practice and policy." Lines 90-95.

Your feedback 6. Data analysis- Line 139: consider here too the comments provided in the abstract regarding data analysis. Lines 150-153: present the global test results and also for the independent variables to attest that the proportional hazard regression was met.

Our response. We have amended the data analysis, and it now reads: "Descriptive and multivariable analyses were performed. Incidence rates were calculated using the mid-year estimated resident population. Pearson's  $\chi^2$  test was used to test the association between categorical variables. A two-tailed p-value of  $<0.05$  was considered statistically significant. In logistic regression, we compared complete treatment with death, irrespective of the cause, lost to follow-up and transferred interstate or overseas. Died of TB was compared with completed treatment, lost to follow-up, died of other causes during treatment for TB, and transferred interstate or overseas. We included all independent variables in all multivariable analyses because we believed they could all affect the outcomes. However, our variable of interest was regionality. The proportional-hazards assumption was assessed using Kaplan-Meier survival curves by including time-dependent covariates in the model and with Schoenfeld residuals. In cases where proportionality assumptions were not met, analyses were stratified. Kaplan-Meier survival curves were used to show various delays in presentation, diagnosis, and treatment between regional and metropolitan cohorts, and Cox proportional hazard analyses were performed to assess these delays. Patient follow-up was censored, 1. at the first visit to a health care facility (Patient treatment delay), 2. at the initiation of TB treatment (Health system delay), 3. at the time a chest x-ray was performed (Diagnostic delay), 4. at the treatment initiation (Treatment initiation delay). Because of limited previous data, analyses of treatment outcomes were conducted using data from 2005 to 2019, while analyses of treatment delays used data from 2012 to 2019." Lines 190-210.

Your feedback 7. Results- Line 158: the 7% and 93% reported cases of TB do not reflect that 45 cases did not have residential information regarding their affiliation to regional or metropolitan.

|                                                                                                                                                                                                                                                                                                                                    |                                                                                                                                                                                                                                                                                                                                                                                                                                                                                                                                                                                                                                                                                                                                                                                                                                                                                                                                                                                                                                                                                                                                                                                                                                                                                                                                                                                                                                                                                                                                                                                                                                                                                                                                                                                                                                                                                                                                                                                                                                                                                                                                                                                                                                                                                                                                                                                                                                                                                                                                                                                                                                                                                                                                                                                                                                                                      |
|------------------------------------------------------------------------------------------------------------------------------------------------------------------------------------------------------------------------------------------------------------------------------------------------------------------------------------|----------------------------------------------------------------------------------------------------------------------------------------------------------------------------------------------------------------------------------------------------------------------------------------------------------------------------------------------------------------------------------------------------------------------------------------------------------------------------------------------------------------------------------------------------------------------------------------------------------------------------------------------------------------------------------------------------------------------------------------------------------------------------------------------------------------------------------------------------------------------------------------------------------------------------------------------------------------------------------------------------------------------------------------------------------------------------------------------------------------------------------------------------------------------------------------------------------------------------------------------------------------------------------------------------------------------------------------------------------------------------------------------------------------------------------------------------------------------------------------------------------------------------------------------------------------------------------------------------------------------------------------------------------------------------------------------------------------------------------------------------------------------------------------------------------------------------------------------------------------------------------------------------------------------------------------------------------------------------------------------------------------------------------------------------------------------------------------------------------------------------------------------------------------------------------------------------------------------------------------------------------------------------------------------------------------------------------------------------------------------------------------------------------------------------------------------------------------------------------------------------------------------------------------------------------------------------------------------------------------------------------------------------------------------------------------------------------------------------------------------------------------------------------------------------------------------------------------------------------------------|
|                                                                                                                                                                                                                                                                                                                                    | <p>Our response: We have amended this statement, and now it reads; “A total of 8,819 TB cases were notified to the Victorian Government Department of Health between 1995 and 2019. Among the 8,819 cases, 611 (7%) were recorded in regional areas, 8,163 (93%) in metropolitan areas of Victoria and 45 (1%) had neither regional nor metropolitan residential addresses (see Fig 1). Forty-five cases with no residential addresses were excluded from the study as they were classified as neither regional nor metropolitan.” Lines 215-219.</p> <p>Your feedback 8. Line 164-65: it is good to present the number of cases excluded. Or preferably provide the progress of pts. in a flow diagram.</p> <p>Our response. Thank you for this suggestion. We have now provided the flow of patients through the study, see Fig 1. Line 224.</p> <p>Your feedback 9. Line 175-177: this result has not been well reflected in the abstract.</p> <p>Our response. Lines 175-177 were referring specifically to issues related to missing data. However, the abstract has been amended to more clearly reflect the overall findings as outlined above. Lines 26-49.</p> <p>Your feedback 10. Table 1: the font size of contents of the table is significantly different from the text in the body.</p> <p>Our response. We have increased the font size on all tables to 11 points.</p> <p>Your feedback 11. The authors also consider avoiding in places where the total add to hundred or cell values added to the sample in respective subgroup. Or consider using '0' or NA to represent 'not available'</p> <p>Our response. The tables have been amended accordingly.</p> <p>Your feedback 12. Discussion- Owing to the arrival of overseas born individuals from high TB burden countries to Australia, there could be an active search for TB among this particular group which may introduce a diagnostic suspicion bias. Was there an effort in this study to exclude that diagnostic suspicion bias was not an issue or was there an effort to reduce it if there was any?</p> <p>Our response. Thanks for raising this point, which we agree may be important in many contexts. We do not believe that this is a significant issue in our study, as the considerable majority of migration-associated testing for TB an active case finding occurs prior to visa issuing in countries of origin and are thus not reflected in these TB cases presented here. Overall, then, we do not account further for diagnostic suspicion bias during the study period.</p> <p>Reference<br/>World Health Organisation. (2022). Strengthening TB surveillance. World Health Organisation. <a href="https://www.who.int/westernpacific/activities/strengthening-tb-surveillance">https://www.who.int/westernpacific/activities/strengthening-tb-surveillance</a></p> |
| <b>Additional Information:</b>                                                                                                                                                                                                                                                                                                     |                                                                                                                                                                                                                                                                                                                                                                                                                                                                                                                                                                                                                                                                                                                                                                                                                                                                                                                                                                                                                                                                                                                                                                                                                                                                                                                                                                                                                                                                                                                                                                                                                                                                                                                                                                                                                                                                                                                                                                                                                                                                                                                                                                                                                                                                                                                                                                                                                                                                                                                                                                                                                                                                                                                                                                                                                                                                      |
| <b>Question</b>                                                                                                                                                                                                                                                                                                                    | <b>Response</b>                                                                                                                                                                                                                                                                                                                                                                                                                                                                                                                                                                                                                                                                                                                                                                                                                                                                                                                                                                                                                                                                                                                                                                                                                                                                                                                                                                                                                                                                                                                                                                                                                                                                                                                                                                                                                                                                                                                                                                                                                                                                                                                                                                                                                                                                                                                                                                                                                                                                                                                                                                                                                                                                                                                                                                                                                                                      |
| <p><b>Financial Disclosure</b></p> <p>Enter a financial disclosure statement that describes the sources of funding for the work included in this submission. Review the <a href="#">submission guidelines</a> for detailed requirements. View published research articles from <a href="#">PLOS ONE</a> for specific examples.</p> | <p>The authors received no specific funding for this work.</p>                                                                                                                                                                                                                                                                                                                                                                                                                                                                                                                                                                                                                                                                                                                                                                                                                                                                                                                                                                                                                                                                                                                                                                                                                                                                                                                                                                                                                                                                                                                                                                                                                                                                                                                                                                                                                                                                                                                                                                                                                                                                                                                                                                                                                                                                                                                                                                                                                                                                                                                                                                                                                                                                                                                                                                                                       |

This statement is required for submission and **will appear in the published article** if the submission is accepted. Please make sure it is accurate.

#### Unfunded studies

Enter: *The author(s) received no specific funding for this work.*

#### Funded studies

Enter a statement with the following details:

- Initials of the authors who received each award
- Grant numbers awarded to each author
- The full name of each funder
- URL of each funder website
- Did the sponsors or funders play any role in the study design, data collection and analysis, decision to publish, or preparation of the manuscript?
- **NO** - Include this sentence at the end of your statement: *The funders had no role in study design, data collection and analysis, decision to publish, or preparation of the manuscript.*
- **YES** - Specify the role(s) played.

\* typeset

#### Competing Interests

Use the instructions below to enter a competing interest statement for this submission. On behalf of all authors, disclose any [competing interests](#) that could be perceived to bias this work—acknowledging all financial support and any other relevant financial or non-financial competing interests.

This statement is **required** for submission and **will appear in the published article** if the submission is accepted. Please make sure it is accurate and that any funding sources listed in your Funding Information later in the submission form are also declared in your Financial Disclosure statement.

View published research articles from [PLOS ONE](#) for specific examples.

The authors have declared that no competing interests exist.

|                                                                                                                                                                                                                                                                                                                                                                                                                                                                                                                                                                                                                                                                                |                                                                                                                                                                                                                                                                                                                                                                                                                                                                                                                                                                                                                                                                                                                                                                                                                        |
|--------------------------------------------------------------------------------------------------------------------------------------------------------------------------------------------------------------------------------------------------------------------------------------------------------------------------------------------------------------------------------------------------------------------------------------------------------------------------------------------------------------------------------------------------------------------------------------------------------------------------------------------------------------------------------|------------------------------------------------------------------------------------------------------------------------------------------------------------------------------------------------------------------------------------------------------------------------------------------------------------------------------------------------------------------------------------------------------------------------------------------------------------------------------------------------------------------------------------------------------------------------------------------------------------------------------------------------------------------------------------------------------------------------------------------------------------------------------------------------------------------------|
| <p><b>NO authors have competing interests</b></p> <p>Enter: <i>The authors have declared that no competing interests exist.</i></p> <p><b>Authors with competing interests</b></p> <p>Enter competing interest details beginning with this statement:</p> <p><i>I have read the journal's policy and the authors of this manuscript have the following competing interests: [insert competing interests here]</i></p> <p>* typeset</p>                                                                                                                                                                                                                                         |                                                                                                                                                                                                                                                                                                                                                                                                                                                                                                                                                                                                                                                                                                                                                                                                                        |
| <p><b>Ethics Statement</b></p> <p>Enter an ethics statement for this submission. This statement is required if the study involved:</p> <ul style="list-style-type: none"> <li>• Human participants</li> <li>• Human specimens or tissue</li> <li>• Vertebrate animals or cephalopods</li> <li>• Vertebrate embryos or tissues</li> <li>• Field research</li> </ul> <p>Write "N/A" if the submission does not require an ethics statement.</p> <p>General guidance is provided below. Consult the <a href="#">submission guidelines</a> for detailed instructions. <b>Make sure that all information entered here is included in the Methods section of the manuscript.</b></p> | <p>Approval from a Human Research Ethics Committee for this study was not required as the data were collected for the purposes of public health action, as defined in the Public Health and Wellbeing Act 2008 and was considered as being for quality assurance and auditing purposes. Patients were informed of the purpose of data collection and consented to their data being used for tuberculosis surveillance and medical research at the time of collection. All data were fully anonymized during the data extraction process. For example, names, phone numbers, addresses, dates of birth of participants were removed. Patient identification numbers, postcodes, gender were coded, and age was changed to age group. In the publications that come from this study, patients will remain anonymous.</p> |

**Format for specific study types**

**Human Subject Research (involving human participants and/or tissue)**

- Give the name of the institutional review board or ethics committee that approved the study
- Include the approval number and/or a statement indicating approval of this research
- Indicate the form of consent obtained (written/oral) or the reason that consent was not obtained (e.g. the data were analyzed anonymously)

**Animal Research (involving vertebrate animals, embryos or tissues)**

- Provide the name of the Institutional Animal Care and Use Committee (IACUC) or other relevant ethics board that reviewed the study protocol, and indicate whether they approved this research or granted a formal waiver of ethical approval
- Include an approval number if one was obtained
- If the study involved *non-human primates*, add *additional details* about animal welfare and steps taken to ameliorate suffering
- If anesthesia, euthanasia, or any kind of animal sacrifice is part of the study, include briefly which substances and/or methods were applied

**Field Research**

Include the following details if this study involves the collection of plant, animal, or other materials from a natural setting:

- Field permit number
- Name of the institution or relevant body that granted permission

**Data Availability**

Authors are required to make all data underlying the findings described fully available, without restriction, and from the time of publication. PLOS allows rare exceptions to address legal and ethical concerns. See the [PLOS Data Policy](#) and [FAQ](#) for detailed information.

Yes - all data are fully available without restriction

A Data Availability Statement describing where the data can be found is required at submission. Your answers to this question constitute the Data Availability Statement and **will be published in the article**, if accepted.

**Important:** Stating 'data available on request from the author' is not sufficient. If your data are only available upon request, select 'No' for the first question and explain your exceptional situation in the text box.

Do the authors confirm that all data underlying the findings described in their manuscript are fully available without restriction?

**Describe where the data may be found in full sentences. If you are copying our sample text, replace any instances of XXX with the appropriate details.**

- If the data are **held or will be held in a public repository**, include URLs, accession numbers or DOIs. If this information will only be available after acceptance, indicate this by ticking the box below. For example: *All XXX files are available from the XXX database (accession number(s) XXX, XXX).*
- If the data are all contained **within the manuscript and/or Supporting Information files**, enter the following: *All relevant data are within the manuscript and its Supporting Information files.*
- If neither of these applies but you are able to provide **details of access elsewhere**, with or without limitations, please do so. For example:

*Data cannot be shared publicly because of [XXX]. Data are available from the XXX Institutional Data Access / Ethics Committee (contact via XXX) for researchers who meet the criteria for access to confidential data.*

*The data underlying the results presented in the study are available from (include the name of the third party*

\*\*\*PA @ ACCEPT: ask for Dryad DOI\*\*\*

Data will be available on this website: <https://datadryad.org/stash>



|                                                                                                                                                                                                                                         |  |
|-----------------------------------------------------------------------------------------------------------------------------------------------------------------------------------------------------------------------------------------|--|
| <p><i>and contact information or URL).</i></p> <ul style="list-style-type: none"><li>• This text is appropriate if the data are owned by a third party and authors do not have permission to share the data.</li></ul> <p>* typeset</p> |  |
| Additional data availability information:                                                                                                                                                                                               |  |

1 **Tuberculosis notifications in regional Victoria, Australia:**  
2 **implications for public health care in a low incidence setting**

3

4 Moyo N<sup>1, 2\*</sup>, Tay EL<sup>3</sup>, Trauer JM<sup>1, 4</sup> Burke L<sup>1</sup>, Jackson J<sup>5, 6</sup>, Commons RJ<sup>7, 8</sup>, Boyd SC<sup>9</sup>, Singh  
5 KP<sup>10</sup>, Denholm JT<sup>1, 10</sup>

6

7 <sup>1</sup> Victorian Tuberculosis Program, Melbourne Health, Melbourne, Victoria, Australia

8 <sup>2</sup> La Trobe University, School of Nursing and Midwifery, Melbourne, Victoria, Australia

9 <sup>3</sup> Communicable Diseases Epidemiology and Surveillance Unit, Health Protection Branch,

10 Public Health Division, Department of Health, Victoria, Australia

11 <sup>4</sup> Monash University, School of Public Health and Preventive Medicine, Melbourne, Victoria,

12 Australia

13 <sup>5</sup> Department of Medicine, Albury-Wodonga Health, Wodonga, Victoria, Australia

14 <sup>6</sup> Faculty of Medicine, University of New South Wales Rural Clinical School, Albury Campus,

15 New South Wales, Australia

16 <sup>7</sup> Internal Medicine Services, Ballarat Health Services, Ballarat, Victoria, Australia

17 <sup>8</sup> Global and Tropical Health Division, Menzies School of Health Research and Charles Darwin

18 University, Darwin, Northern Territory, Australia

19 <sup>9</sup> Royal Brisbane and Women's Hospital, Brisbane, South Australia, Australia

20 <sup>10</sup> Department of Infectious Diseases, Doherty Institute for Infection and Immunity,

21 University of Melbourne, Parkville, Victoria, Australia

22

23 \* [nompiloo@yahoo.com](mailto:nompiloo@yahoo.com)

24

## 25 **Abstract**

26 Background: Regionality is often a significant factor in tuberculosis (TB) management and  
27 outcomes worldwide. A wide range of context-specific factors may influence these  
28 differences and change over time. We compared TB treatment in regional and metropolitan  
29 areas, considering demographic and temporal trends affecting TB diagnosis and outcomes.  
30 Methods: Retrospective analyses of data for patients notified with TB in Victoria, Australia,  
31 were conducted. The study outcomes were treatment delays and treatment outcomes.  
32 Multivariable Cox proportional hazard model analyses were performed to investigate the  
33 effect of regionality in the management of TB. Six hundred and eleven (7%) TB patients were  
34 notified in regional and 8,163 (93%) in metropolitan areas between 1995 and 2019. Of the  
35 611 cases in the regional cohort, 401 (66%) were overseas-born. Fifty-one percent of the  
36 overseas-born patients in regional Victoria developed TB disease within five years of arrival  
37 in Australia. Four cases of multidrug-resistant tuberculosis were reported in regional areas,  
38 compared to 97 cases in metropolitan areas. A total of 3,238 patients notified from 2012 to  
39 2019 were included in the survival analysis. Patient follow-up was censored at the first visit  
40 to the health care facility (Patient treatment delay) and at the initiation of TB treatment  
41 (Health system delay). Patient, health system, and treatment delays were similar in regional  
42 and metropolitan areas for cases with pulmonary involvement. Cases with extrapulmonary  
43 TB in regional areas have a non-significantly longer healthcare system delay than patients in  
44 metropolitan (median 64 days versus 54 days, AHR = 0.8, 95% CI 0.6-1.0, P = 0.094).

45 Conclusion: Tuberculosis in regional Victoria is common among the overseas-born  
46 population, and patients with extrapulmonary TB in regional areas experienced a non-  
47 significant minor delay in treatment commencement with no apparent detriment to

48 treatment outcomes. Improving access to LTBI management in regional areas may reduce  
49 the burden of TB.

50 **Keywords:** regional, metropolitan, tuberculosis, treatment completion, delayed diagnosis

51

52 **Word count:** 3,715 words, excluding tables and references.

53

## 54 **Background**

55

56 Victoria is the second most highly populated state in Australia, with 6.69 million residents  
57 as of March 2020 [1]. It has the highest population growth rate (1.8%), with net overseas  
58 migration functioning as the primary contributor to population growth in Victoria [1].

59 Victoria is divided into two distinct socio-geographic areas, metropolitan and regional.  
60 Metropolitan is defined as the 31 local government areas of the city of Melbourne, while  
61 the 48 local government areas outside of the city are defined as regional. Based on 2016  
62 census data, 4,485,211 of Victoria's total population of 5,926,624 lived within Melbourne,  
63 with less than 25% of the population living regionally [2]. This equates to an average  
64 population density of 500 people per square kilometre in metropolitan Victoria compared to  
65 an average of 6 people per square kilometre in regional Victoria.

66 There are some differences in the provision of health care services between  
67 Victoria's metropolitan and regional areas. Unlike patients in most metropolitan areas,  
68 patients in regional Victoria may reside a considerable distance from hospitals. Most  
69 regional hospitals do not have negative pressure rooms for isolating TB patients during their  
70 infectious stage; therefore, infectious patients need to be transferred to metropolitan  
71 hospitals. Some regional hospitals have no on-site TB specialist medical practitioners, and

72 because of the distance from the hospital, there are very few opportunities for home visits  
73 from Victorian Tuberculosis Program specialist nursing staff, so regional patients must rely  
74 on telephone or video consultations for their diagnostic and follow-up consultations as well  
75 as their treatment supervision visits. The Victorian Tuberculosis Program (VTP) is Victoria's  
76 state-wide provider and coordinator of tuberculosis control.

77 In regional Victoria, the number of people born overseas is increasing. For example, in  
78 the 2006 census, there were 1,964 Indian-born people recorded as living in regional Victoria,  
79 which grew to 8,592 persons in 2016; similarly, the Philippines-born population was 2,700 in  
80 2006 and 6,085 in 2016 [2]. The Australian Government has made changes to  
81 Commonwealth immigration policy intended to stimulate economic growth outside  
82 metropolitan areas in recent years. These various changes are focused on attracting  
83 migrants and international students to regional areas [3]. Historically, most migrants to  
84 Victoria have settled in the capital city of Melbourne, with many coming from countries with  
85 high TB incidence, such as India, the Philippines, and Sudan [4,5]. Such changes to policy  
86 influence migration patterns and may impact the distribution of TB cases within Victoria,  
87 which may also have implications for optimising health service delivery models [5].

88 TB incidence in Victoria remains low, with 436 TB cases notified in 2018, representing 6.9  
89 cases per 100,000 population [6]. In Australia, research to date has tended to focus on  
90 metropolitan areas, where case numbers typically predominate. Understanding TB  
91 treatment delays among regional patients provides important insights into VTP performance  
92 and is a critical step towards tuberculosis elimination. Globally, TB surveillance data have  
93 been recognised as an important data source for assessing the disease burden and  
94 epidemiological trends in TB [7]. Evaluating treatment outcomes and delays in regional

95 areas will inform practice and policy. We aimed to describe notified TB cases in regional  
96 Victoria from 1995 to 2019, including trends and outcomes over these 24 years.

97

## 98 **Methods**

### 99 Data Source

100 We used routinely collected TB surveillance data. Data for all notified active tuberculosis  
101 cases in Victoria are collected by the VTP nurse consultants. Data are stored electronically in  
102 the Public Health Events Surveillance System (PHESS). PHESS is a centralised surveillance  
103 database containing data on all notifiable diseases in Victoria since 1991 [6]. The notification  
104 of active tuberculosis cases is mandatory in Victoria under the Public Health and Wellbeing  
105 legislation [6]. PHESS has standardised data collection templates to ensure consistency.  
106 Nurse consultants record patient demographic, clinical data and TB contacts in PHESS.

107 Data on the estimated resident population for all local government areas were obtained  
108 from the Australian Bureau of Statistics (ABS). The estimated resident population is the  
109 official figure of Australia's population based on the concept of "usual residence" and refers  
110 to all people, regardless of nationality or citizenship, who usually live in Australia, except  
111 foreign diplomatic personnel and their families [8].

### 112 *Study design*

113 We conducted a retrospective cohort study. Patients notified to the Australian department  
114 of health with active TB from 1995 to 2019 were identified. We analysed the data of these  
115 patients from the time they first developed TB symptoms until they completed TB  
116 treatment. Our study adhered to the Strengthening The Reporting of Observational Studies  
117 in Epidemiology (STROBE) guidelines (see S7 Table).

118

119 *Study setting*

120 The fieldwork for this study was conducted in Victoria by the VTP staff. Funded by the  
121 Victorian Government Department of Health, VTP is a centralised program located in  
122 metropolitan Victoria and works in partnership with hospitals and clinics in  
123 managing tuberculosis. All tuberculosis patients in Victoria are supervised by VTP nurse  
124 consultants [9,10].

125 *Study Population*

126 The population for this study included all people of all ages who had been diagnosed with  
127 tuberculosis and notified to the department of health.

128 *Inclusion criteria.*

129 Patients were included in the study if they met the following inclusion criteria:

- 130 1. Diagnosed with TB in Victoria and notified to the Victorian department of health  
131 from 1 January 1995 to 31 December 2019. TB cases were defined in accordance  
132 with a standard national case definition based on either laboratory definitive  
133 evidence requiring isolation of *Mycobacterium tuberculosis* complex by culture or  
134 nucleic acid testing or clinical diagnosis accompanied by treatment [11].
- 135 2. Having received tuberculosis treatment in Victoria.

136

137 *Exclusion criteria.*

138 Patients were excluded from the study if they:

- 139 1. were notified before 1995 or after 2019
- 140 2. Lacking residential addresses

141

142

143 *Variables*

144 The dependent variables were the treatment delays and the treatment outcomes (study  
145 outcomes). Treatment outcomes included completed treatment, lost to follow up, died of  
146 TB, died of other causes during treatment for TB, and transferred interstate or overseas. For  
147 the treatment delays, we adapted the definitions outlined by Van Wyk et al. [12], which  
148 proposed that: 'Patient treatment delay' is the period (in the number of days) between the  
149 onset of any self-reported TB symptoms and the first visit to a health care facility. 'Health  
150 system delay' is the period (in the number of days) between the first health care facility visit  
151 and initiation of TB treatment. 'Diagnostic delay' is defined as the period (in the number of  
152 days) between the onset of any self-reported TB-related symptoms and the time a chest x-  
153 ray was performed. 'Treatment initiation delay' was the period between a positive specimen  
154 (TB confirmed) and treatment initiation.

155 We also extracted the following independent variables from PHESS, (1) demographic  
156 data: age (age groups in years), sex (male or female), country of birth (name of the  
157 country), Aboriginal and Torres Strait Islander status (Aboriginal and/or Torres Strait  
158 Islander or not Aboriginal and/or Torres Strait Islander), local government areas (local  
159 government area), self-reported residency status (Australian-born, permanent resident,  
160 refugee/humanitarian, visitor, overseas student, other and unknown status), and for  
161 overseas-born cases, year of arrival in Australia (year). (2) Clinical characteristics: year  
162 of tuberculosis notification (year), the manifestation of tuberculosis (pulmonary,  
163 extrapulmonary or both), chest X-ray results (abnormal, cavitation or normal), laboratory  
164 results (smear, culture, or gene expert), and treatment outcome (died of TB, died of other  
165 causes during treatment for TB, completed treatment, lost to follow up, and transferred  
166 interstate or overseas).



167

**168 Ethical considerations**

169 Approval from a Human Research Ethics Committee for this study was not required as  
170 the data were collected for the purposes of public health action, as defined in the Public  
171 Health and Wellbeing Act 2008 and were considered as being for quality assurance and  
172 auditing purposes. Patients were informed of the purpose of data collection and consented  
173 to their data being used for tuberculosis surveillance and medical research at the time of  
174 collection. All data were fully anonymised during the data extraction process. For example,  
175 participants' names, phone numbers, addresses, and birth dates were removed. Patient  
176 identification numbers, postcodes, and gender were coded. Age was changed to age group.  
177 In the publications that come from this study, patients will remain anonymous.

178

**179 Data analysis**

180 Data cleaning and analyses were conducted using STATA version 14.

181

*182 Managing missing data*

183 We used a listwise deletion method when missing data contained residential addresses  
184 (participants were allocated neither to regional nor metropolitan areas) because our  
185 exposure of interest was regionality. When missing data did not have the key variable (i.e.,  
186 residential address), we utilised the pairwise deletion approach, which allowed us to retain  
187 data and reduce the possibility of selection bias. 

188

*189 Analysis*

190 Descriptive and multivariable analyses were performed. Incidence rates were calculated  
191 using the mid-year estimated resident population. Pearson's  $\chi^2$  test was used to test the  
192 association between categorical variables. A two-tailed  $p$  value of  $<0.05$  was considered  
193 statistically significant. In logistic regression, we compared complete treatment with death,  
194 irrespective of the cause, lost to follow-up and transferred interstate or overseas. Died of TB  
195 was compared with completed treatment, lost to follow-up, died of other causes during  
196 treatment for TB, and transferred interstate or overseas.

197 We included all independent variables in all multivariable analyses because we believed  
198 they could all affect the outcomes. Our variable of interest was regionality. The  
199 proportional-hazards assumption was assessed using Kaplan-Meier survival curves by  
200 including time-dependent covariates in the model and with Schoenfeld residuals. In cases  
201 where proportionality assumptions were not met, analyses were stratified. Kaplan-Meier  
202 survival curves were used to show various delays in presentation, diagnosis, and treatment  
203 between regional and metropolitan cohorts, and Cox proportional hazard analyses were  
204 performed to assess these delays. Patient follow-up was censored, 1. at the first visit to a  
205 health care facility (Patient treatment delay), 2. at the initiation of TB treatment (Health  
206 system delay), 3. at the time a chest x-ray was performed (Diagnostic delay), 4. at the  
207 treatment initiation (Treatment initiation delay).

208 Because of limited previous data, treatment outcomes were analysed using data from 2005  
209 to 2019, and for the analysis of treatment delays, we used data from 2012 to 2019.

210

211

## 212 Results

213 A total of 8,819 TB cases were notified to the Victorian Government Department of  
214 Health between 1995 and 2019. Among the 8,819 cases, 611 (7%) were recorded in regional  
215 areas, 8,163 (93%) in metropolitan areas of Victoria and 45 (1%) had neither regional nor  
216 metropolitan residential addresses (see Fig 1). Forty-five cases with no residential addresses  
217 were excluded from the study as they were classified as neither regional nor metropolitan.  
218 Of the 611 people in regional areas, 343 (56%) were male, 401 (66%) were overseas-born,  
219 and for 10 cases (2%), there was no country of birth recorded. Among the 8,163 TB cases in  
220 metropolitan areas, 4,316 (53%) were male, 8 (0.1%) had no gender reported and 7,375  
221 (90%) were overseas-born.

### 222 Fig 1. The flow of patients through the study

223

224 Data recorded before 2005 had missing treatment outcomes for many cases and were  
225 therefore excluded from the analysis of treatment outcomes (Fig 1). The overall treatment  
226 completion rates were similar among the regional and metropolitan cohorts: 85% and 90%,  
227 respectively.

228 Table 1 describes the characteristics of notified TB cases in Victoria from 1995 to 2019 by  
229 location of residence and birth. The proportion of overseas-born cases in the regional cohort  
230 was 66% compared to 90%, in metropolitan areas. The 25 to 34 age group had the largest  
231 proportion of cases in both regional and metropolitan areas. In this age bracket, there were  
232 27% of overseas-born and 8% of Australian-born cases in regional settings, and 31% of  
233 overseas-born and 11% of Australian born cases in metropolitan areas. The proportions of  
234 multidrug-resistant TB (MDR-TB) cases among the regional and metropolitan patients were  
235 similar. The four MDR-TB cases reported in the regional cohort all occurred in people born

236 overseas. In the metropolitan cohort, the proportion of MDR-TB cases was the same (1%)  
237 amongst overseas and Australian-born persons. Extensive drug-resistant TB (0.03%) and  
238 genotypic rifampicin-resistant TB (0.04%) were only reported in the metropolitan area  
239 among overseas-born cases.

240

241

242

243

244

245

246

247

248

249

250

251

252

253

254

255

256

257

258

259

260 **Table 1. Characteristics of the notified cases of Tuberculosis in Victoria from 1995 to 2019.**

| Variable                      |                                                      | Regional (n = 601)         |                 |                              |                 | Metropolitan (n = 8,163)     |                 |                              |                 |
|-------------------------------|------------------------------------------------------|----------------------------|-----------------|------------------------------|-----------------|------------------------------|-----------------|------------------------------|-----------------|
|                               |                                                      | Overseas-born<br>(n = 401) |                 | Australian-born<br>(n = 200) |                 | Overseas-born<br>(n = 7,375) |                 | Australian born<br>(n = 788) |                 |
|                               |                                                      | Total                      | Proportion<br>% | Total                        | Proportion<br>% | Total                        | Proportion<br>% | Total                        | Proportion<br>% |
| Gender                        | Male                                                 | 215                        | 54              | 123                          | 62              | 3,869                        | 52              | 447                          | 57              |
|                               | Female                                               | 186                        | 46              | 77                           | 39              | 3,500                        | 47              | 339                          | 43              |
|                               | Unknown                                              | 0                          | 0               | 0                            | 0               | 6                            | 0               | 2                            | 0               |
| Age group                     | Under 5                                              | 3                          | 1               | 11                           | 6               | 31                           | 0               | 115                          | 15              |
|                               | 5-14                                                 | 12                         | 3               | 7                            | 4               | 122                          | 2               | 79                           | 10              |
|                               | 15-24                                                | 49                         | 12              | 14                           | 7               | 1,303                        | 18              | 129                          | 16              |
|                               | 25-34                                                | 110                        | 27              | 15                           | 8               | 2,272                        | 31              | 87                           | 11              |
|                               | 35-44                                                | 60                         | 15              | 10                           | 5               | 1,188                        | 16              | 60                           | 8               |
|                               | 45-54                                                | 49                         | 12              | 15                           | 8               | 715                          | 10              | 67                           | 9               |
|                               | 55-64                                                | 33                         | 8               | 31                           | 16              | 562                          | 8               | 56                           | 7               |
|                               | 65 and above                                         | 85                         | 21              | 97                           | 49              | 1,181                        | 16              | 195                          | 25              |
|                               | Unknown                                              | 0                          | 0               | 0                            | 0               | 1                            | 0               | 0                            | 0               |
|                               | Manifestation                                        | Pulmonary                  | 193             | 48                           | 131             | 66                           | 2,864           | 39                           | 459             |
| Pulmonary Plus<br>other sites |                                                      | 42                         | 10              | 18                           | 9               | 936                          | 13              | 117                          | 15              |
| Extra Pulmonary               |                                                      | 162                        | 40              | 49                           | 25              | 3,396                        | 46              | 206                          | 26              |
| Unknown                       |                                                      | 4                          | 1               | 2                            | 1               | 179                          | 2               | 6                            | 1               |
| Susceptibility                | Fully sensitive                                      | 233                        | 58              | 117                          | 59              | 4,376                        | 59              | 402                          | 51              |
|                               | Multidrug -<br>resistant<br>tuberculosis             | 4                          | 1               | 0                            | 0               | 88                           | 1               | 9                            | 1               |
|                               | Other resistance                                     | 12                         | 3               | 2                            | 1               | 379                          | 5               | 29                           | 4               |
|                               | Extensively drug-<br>resistant<br>tuberculosis       | 0                          | 0               | 0                            | 0               | 2                            | 0               | 0                            | 0               |
|                               | Genotypic<br>Rifampicin<br>resistant<br>tuberculosis | 0                          | 0               | 0                            | 0               | 3                            | 0               | 0                            | 0               |
|                               | Unknown                                              | 152                        | 38              | 81                           | 41              | 2,527                        | 34              | 348                          | 44              |

|                                   |                                                   |     |    |    |    |       |    |     |    |
|-----------------------------------|---------------------------------------------------|-----|----|----|----|-------|----|-----|----|
| Treat outcome (from 2005 to 2019) | Completed treatment                               | 238 | 86 | 88 | 82 | 4,491 | 90 | 442 | 92 |
|                                   | Lost to follow-up                                 | 5   | 2  | 4  | 4  | 106   | 2  | 8   | 2  |
|                                   | Died from other cause                             | 12  | 4  | 12 | 11 | 128   | 3  | 22  | 5  |
|                                   | Died of tuberculosis                              | 4   | 1  | 3  | 3  | 58    | 1  | 5   | 1  |
|                                   | Still on treatment at the time of data extraction | 1   | 0  | 0  | 0  | 1     | 0  | 0   | 0  |
|                                   | Transferred interstate or overseas                | 18  | 6  | 0  | 0  | 222   | 4  | 1   | 0  |
|                                   | Unknown                                           | 0   | 0  | 0  | 0  | 1     | 0  | 0   | 0  |

261 Note: Treatment outcome regional, n = 385 and Metro, n = 5,485.

262

263 The number of tuberculosis cases in regional Victoria has fluctuated over time, with 129

264 notified from 1995 to 1999, 97 from 2000 to 2004, and 155 from 2015 to 2019. Table 2

265 compares the TB incidence rate between regional and metropolitan areas. From 1995 to

266 1999, there were 129 cases with a mean incidence rate of 2.0, 95% CI 1.3-2.7 per 100,000

267 population in regional Victoria, while in the metropolitan there were 1,271 cases with a

268 mean incidence rate of 7.7, 95% CI 6.9-8.4. The TB incidence in regional and metropolitan

269 areas is fluctuating; in the 2015 to 2019 period, the mean incidence for the regional cohort

270 was 2.1, 95% CI 1.5-2.7 and 7.9, 95% CI 7.3-8.4 in the metropolitan.

271

272

273

274

275

276

277 **Table 2. Tuberculosis incidence rate per 100,000 population in regional Victoria and**278 **metropolitan Victoria from 1995 to 2019.**

| Years     | Regional areas     |                                                     | Metropolitan areas |                                                     |
|-----------|--------------------|-----------------------------------------------------|--------------------|-----------------------------------------------------|
|           | Tuberculosis cases | Mean incidence rate per 100,000 population (95% CI) | Tuberculosis cases | Mean incidence rate per 100,000 population (95% CI) |
| 1995-1999 | 129                | 2.0 (1.3-2.7)                                       | 1,271              | 7.7 (6.9-8.4)                                       |
| 2000-2004 | 97                 | 1.5 (1.0-1.9)                                       | 1,407              | 8.0 (7.6-8.4)                                       |
| 2005-2009 | 98                 | 1.4 (1.2-1.6)                                       | 1,742              | 9.1 (8.9-9.4)                                       |
| 2010-2014 | 132                | 1.8 (1.4-2.1)                                       | 1,841              | 8.7 (7.9-9.5)                                       |
| 2015-2019 | 155                | 2.1 (1.5-2.7)                                       | 1,902              | 7.9 (7.3-8.4)                                       |

279

280 TB cases among overseas-born people aged 20 to 49 years have rapidly increased since  
 281 2004 (Fig 2). Conversely, in the Australian-born population aged 20 to 49 years, cases have  
 282 remained stable since 1995. The number of TB cases among Australian-born people aged  
 283  $\geq 50$  years has decreased from 1995 and slightly upturned since 2014.

284 **Fig 2. Tuberculosis cases in regional Victoria by year of notification, age, and country of**  
 285 **birth from 1995 to 2019.**

286

287 A total of 386 overseas-born cases had their year of arrival in Australia recorded. Half of  
 288 the people (197; 51%) developed TB disease within five years of arrival in Australia. Out of  
 289 these 197 cases, 58 (29%) were permanent residents, 43 (22%) were refugees, 19 (10%)  
 290 were visitors, 18 (9%) were overseas students, and 59 (30%) had unknown residential  
 291 status. Among 19 overseas students, 18 developed TB within five years and one between six

292 and 11 years of arrival. Of the 46 refugees recorded in the study, 43 were diagnosed with TB  
293 within five years of arrival. The risk of developing TB remained for many years after people  
294 arrived in Australia; 10 (3%) people were diagnosed with TB after 53 years of arrival (see, Fig  
295 3).

296 **Fig 3. Notified cases of tuberculosis in the overseas-born people in regional Victoria from**  
297 **1995-2019 by the number of years since arrival in Australia.**

298

299 In 2016, the TB incidence rate for the Australian-born population was 0.5 per 100,000  
300 people and 12.0 per 100,000 people born overseas. Thirteen frequently reported countries  
301 of birth for the overseas-born cases from 1999 to 2019 are shown in Fig 4. People born in  
302 these 13 countries make up 62% of the overseas-born cases during the study period. India  
303 had the highest number of notified cases, 58 (14%), followed by the Philippines, 48 (12%).  
304 People born in India and the Philippines accounted for 26% of all the TB cases in regional  
305 areas.

306 **Fig 4. Notified cases of tuberculosis in regional Victoria for overseas-born people from**  
307 **1999 to 2019, by country of birth.**

308

309 Among 5,870 cases with known treatment outcomes, 5,259 (90%) completed treatment,  
310 124 (2%) were lost to follow-up, 174 (3%) died of another cause while on TB therapy, 70  
311 (1%) died of TB, 2 (0.03%) were still on treatment at the time of data extraction, and 241  
312 (4%) were transferred either interstate or overseas. Table 3 shows univariable and  
313 multivariable analyses of predictors of treatment completion and dying of TB. Living in a  
314 regional area was associated with lower odds of treatment completion on univariable  
315 analysis (OR = 0.6, 95% CI 0.5-0.8, P = 0.002). After adjusting for the effect of age, sex, drug



316 susceptibility and country of birth in the model, living in a regional area remained  
317 significantly associated with lower treatment completion (Adjusted OR [AOR] = 0.7, 95% CI  
318 0.5-0.9,  $P = 0.019$ ). On multivariable analysis, older age and male sex were also predictors of  
319 lower treatment completion.

320 Living in a regional area did not significantly increase the odds of dying from TB on  
321 univariable analysis (OR = 1.6, 95% CI 0.7-3.5,  $P = 0.244$ ). In a model that included all the five  
322 variables in the multivariable analysis, regionality was not associated with dying of TB (AOR  
323 = 1.8, 95% CI 0.7-4.2,  $P = 0.198$ ). Older age was significantly associated with dying of TB.

324

325

326

327

328

329

330

331

332

333

334

335

336

337

338

339

340 **Table 3. Univariable and multivariable analysis of predictors of treatment completion and**  
 341 **dying of tuberculosis from 2005 to 2019.**

| Variable                                                                    | Treatment completion |         |                        |         | Died of tuberculosis |         |                        |         |
|-----------------------------------------------------------------------------|----------------------|---------|------------------------|---------|----------------------|---------|------------------------|---------|
|                                                                             | Univariable analysis |         | Multivariable analysis |         | Univariable analysis |         | Multivariable analysis |         |
|                                                                             | OR (95%)             | P value | AOR (95%)              | P value | OR (95%)             | P value | AOR (95%)              | P value |
| Regional (reference group: metropolitan cases)                              | 0.6 (0.5-0.8)        | 0.002   | 0.7 (0.5-0.9)          | 0.019   | 1.6 (0.7-3.5)        | 0.244   | 1.8 (0.7-4.2)          | 0.198   |
| Age ≥ 65 years (reference group: age < 65 years)                            | 0.2 (0.2-0.3)        | <0.0001 | 0.2 (0.2-0.3)          | <0.0001 | 12.6 (7.6-20.9)      | <0.0001 | 9.9 (5.8-16.9)         | <0.0001 |
| Male sex (reference group: female sex)                                      | 0.6 (0.5-0.7)        | <0.0001 | 0.7 (0.6-0.8)          | <0.0001 | 1.8 (1.1-3.0)        | 0.020   | 1.5 (0.9-2.6)          | 0.131   |
| Drug resistant tuberculosis (reference group: fully sensitive tuberculosis) | 0.8 (0.6-1.1)        | 0.228   | 0.8 (0.6-1.1)          | 0.128   | 1.7 (0.8-3.5)        | 0.179   | 1.9 (0.9-4.1)          | 0.104   |
| Overseas-born (reference group: Australian-born)                            | 0.9 (0.7-1.2)        | 0.415   | 0.7 (0.5-1.1)          | 0.094   | 0.9 (0.4-1.8)        | 0.682   | 1.8 (0.7-4.9)          | 0.238   |

342 Notes: AOR is an adjusted odds ratio.

343 The effect of regionality in multivariable Cox proportional hazard model analyses is

344 shown in Table 4. The model included age, sex, place of birth, place of residence, and drug

345 susceptibility. Data prior to 2012 were incomplete in relation to TB symptom onset, chest X-

346 ray findings and laboratory investigations and were therefore unable to be included in the  
 347 analyses of delay in TB diagnosis and treatment. A total of 241 cases in regional and 2,997 in  
 348 metropolitan areas were included.

349 Patient and health system delays were similar in regional and metropolitan areas for  
 350 cases with pulmonary involvement. In regional areas, people with pulmonary involvement  
 351 underwent chest x-ray (diagnostic delay) slightly sooner than those notified in metropolitan  
 352 areas (median six days versus nine days, AHR = 1.2, 95% CI 1.0-1.5, P = 0.047). Conversely,  
 353 healthcare system delay was non-significantly longer in regional than in metropolitan  
 354 patients (median 64 days versus 54 days, AHR = 0.8, 95% CI 0.6-1.0, P = 0.094).

355

356 **Table 4. Adjusted relationship between regionality in Cox regression models of delays in**  
 357 **the cascade of care among tuberculosis patients in Victoria from 2012 to 2019.**

| Time period<br>outcome                                       | Regional<br>area<br>Median<br>(interquartile<br>range) days | Metropolitan area<br>Median<br>(interquartile<br>range) days | Effect of regional in Cox regression analysis |                                       |                                      |         |
|--------------------------------------------------------------|-------------------------------------------------------------|--------------------------------------------------------------|-----------------------------------------------|---------------------------------------|--------------------------------------|---------|
|                                                              |                                                             |                                                              | Number<br>observed<br>in<br>regional          | Number<br>observed in<br>metropolitan | Adjusted<br>Hazard ratio<br>(95% CI) | P-value |
| Patient with<br>pulmonary<br>involvement                     |                                                             |                                                              |                                               |                                       |                                      |         |
| Patient delay                                                | 21 (1-76)                                                   | 24 (1-67)                                                    | 113                                           | 1,293                                 | 0.9 (0.8-1.1)                        | 0.389   |
| Health system<br>delay                                       | 21.5(7-44)                                                  | 25 (7-65)                                                    | 146                                           | 1,691                                 | 1.2 (1.0-1.4)                        | 0.102   |
| Diagnostic<br>delay:<br>Presentation to<br>First chest-x-ray | 6 (0-27)                                                    | 9 (0-41)                                                     | 122                                           | 1,343                                 | 1.2 (1.0-1.5)                        | 0.047   |

|                                                                       |             |             |     |       |               |       |
|-----------------------------------------------------------------------|-------------|-------------|-----|-------|---------------|-------|
| Treatment delay: First chest X-ray to start of tuberculosis treatment | 8 (3-23)    | 9 (3-29)    | 131 | 1,565 | 1.0 (0.9-1.3) | 0.614 |
| Extrapulmonary patients                                               |             |             |     |       |               |       |
| Patient delay                                                         | 11.5 (0-68) | 23 (0-75)   | 62  | 907   | 1.0 (0.7-1.2) | 0.756 |
| Health system delay                                                   | 64 (26-137) | 54 (21-112) | 78  | 1,107 | 0.8 (0.6-1.0) | 0.094 |
| Diagnostic delay: Presentation to First chest x-ray                   | 26 (5-92)   | 30 (5-72)   | 47  | 798   | 0.9 (0.7-1.2) | 0.393 |
| All patients                                                          |             |             |     |       |               |       |
| Treatment delay 2: specimen test to treatment initiation              | 7 (1-19)    | 5 (1-17)    | 151 | 1,996 | 1.0 (0.8-1.2) | 0.747 |

358

359 The Kaplan-Meier curves for patient delay are shown in Fig 5.

360 **Fig 5. Kaplan-Meier curves in tuberculosis patients in Victoria, Australia from 2012 to**

361 **2019.**

362

## 363 Discussion

364 We report the trends and treatment outcomes of notified TB cases in regional areas of

365 Victoria, Australia, from 1995 to 2019. The incidence of TB is low in regional areas, and this

366 is consistent with the findings from studies reported in the United States of America (USA)

367 and the United Kingdom. For example, a study in Appalachia, USA, reported that in 2005 the  
368 rate of tuberculosis in regional Appalachia was 2.1 compared to 2.7 per 100,000 population  
369 in metropolitan areas [13]. A similar study conducted in England and Wales from 2001 to  
370 2003 found that the rate of TB in metropolitan areas was 6.3-fold higher compared to  
371 regional areas [14].

372 We observed that there had been a slight increase in TB incidence in regional Victoria  
373 from 1995 to 2019. The increase in TB incidence in regional Victoria is not surprising  
374 considering the increase in people born in high TB incidence countries [2]. In the regional  
375 cohort, the proportion of TB among the overseas-born population was twice that of the  
376 Australia-born people. There is an increase in TB cases aged between 20 and 49 years  
377 among the overseas-born in the regional cohort. These results suggest there may be a public  
378 health benefit in increasing latent TB detection and treatment in regional areas, targeting  
379 20-49-year-old overseas-born people, and offering TB preventative therapy to those found  
380 with latent TB.

381 In regional Victoria, TB resistance was more common in overseas-born cases, consistent  
382 with other Australian studies [6,15]. We analysed the time from arrival in Australia to TB  
383 diagnosis for overseas-born cases in the regional cohort. More than half of the overseas-  
384 born cases were notified within five years of arrival in Australia. The high TB notification  
385 within the first five years of arrival may be attributed to the latent TB reactivation [16]. It is  
386 worth noting that the majority of the refugees were diagnosed within five years of arrival.  
387 This may be a result of more intensive screening soon after arrival, including testing for LTBI  
388 in asylum seekers but not migrants more generally. Refugees may also return overseas less  
389 frequently than other migrants and be less likely to be reinfected.

390 In this study, health-seeking behaviour and treatment outcomes were similar between  
391 the regional and metropolitan settings. These results suggest that existing programs are  
392 functioning well, although the possible trend toward health service delays requires further  
393 monitoring and reviewing opportunities for programmatic strengthening. In addition,  
394 people aged over 64 years are at significantly greater risk of dying from TB and, in  
395 appreciation of this risk, more intensive care may be required.

396 Due to a paucity of research in regional areas of countries with a low incidence of TB, we  
397 cannot make a direct comparison between our study and other published literature. Putting  
398 aside the comparison between regional and metropolitan data, our results in relation to  
399 delays in TB diagnosis and treatment are consistent with other Australian studies as well as  
400 systematic reviews [10,17,18]. For example, Bello et al., [17] performed a systematic review  
401 of 198 studies. They reported a median duration of patient delay of 28 days and a health  
402 system delay of 18 days compared to 21 days for each of these categories for the regional  
403 patients in our study. Of interest, extrapulmonary tuberculosis in our cohort had a much  
404 longer health system delay, averaging 64 days for regional patients.

405

#### 406 Limitations

407 Strengths of this study include the use of a comprehensive central database that includes  
408 important demographic, clinical and laboratory data, allowing for the incorporation of other  
409 factors outlined in this manuscript and a long study period of 25 years. However, we  
410 acknowledge that data for the entire study period are not available for all data fields (e.g.,  
411 treatment outcomes, health system delays), limiting trend analysis. Some of the data in our  
412 study, such as dates of symptom onset and healthcare presentation, were collected  
413 retrospectively from patients and thus may contain inaccuracies relating to recall bias. Data

414 on some factors that could have influenced the treatment delay and outcomes, such as  
415 educational level was limited.

416

## 417 **Conclusion**

418 Tuberculosis in regional Victoria is more common among the overseas-born population,  
419 and patients with extrapulmonary TB in regional areas have non-significant minor delays in  
420 treatment commencement. Increasing migration from high incidence TB countries to  
421 regional settings in Australia requires an ongoing review of available and accessible health  
422 services to limit delays in timely diagnosis and treatment. Increasing access to LTBI  
423 management and enhanced diagnostic pathways in regional areas may assist in reducing the  
424 burden and impact of TB in the future.

425

## 426 **Author Contributions**

427 **Nompilo Moyo:** Conceptualization, Formal analysis, Methodology, Project administration,  
428 Writing – original draft.

429 **Tay EL:** Data curation, Writing – review & editing.

430 **Trauer JM, Burke L, Boyd SC, Singh KP, Jackson J, Commons RJ:** Writing – review & editing.

431 **Denholm JT:** Conceptualization, Supervision, Writing – review & editing.

432

## 433 **Acknowledgements**

434 The authors would like to thank the clinical nurse consultants for collecting and entering  
435 data into the database.

436

437



## 438 **References**

- 439 1. Australian Bureau of Statistics. National, state and territory population. [Internet].  
440 Australian Bureau of Statistics.; 2020 [cited 2020 Nov 30]. Available from:  
441 [https://www.abs.gov.au/statistics/people/population/national-state-and-territory-  
443 population/latest-release](https://www.abs.gov.au/statistics/people/population/national-state-and-territory-<br/>442 population/latest-release)
- 443 2. Australian Bureau of Statistics. 2016 Census Community Profiles. [Internet]. Australian  
444 Bureau of Statistics.; 2017 [cited 2020 Nov 30]. Available from:  
445 [https://quickstats.censusdata.abs.gov.au/census\\_services/getproduct/census/2016/co  
447 mmunityprofile/2RVIC?opendocument](https://quickstats.censusdata.abs.gov.au/census_services/getproduct/census/2016/co<br/>446 mmunityprofile/2RVIC?opendocument)
- 447 3. Department of Home Affairs, Australia. Regional migration. [Internet]. Department of  
448 Home Affairs, Australia.; 2020 [cited 2020 Nov 30]. Available from:  
449 <https://immi.homeaffairs.gov.au/visas/working-in-australia/regional-migration>
- 450 4. Trauer JM, Williams B, Laemmle-Ruff I, Horyniak D, Caplice LVS, McBryde ES, et al.  
451 Tuberculosis in migrants to Australia: Outcomes of a national screening program.  
452 *Lancet Reg Health West Pac.* 2021;10:100135–100135.
- 453 5. McBryde ES, Denholm JT. Risk of active tuberculosis in immigrants: effects of age,  
454 region of origin and time since arrival in a low-exposure setting. *Med J Aust.*  
455 2012;197(8):458–61.
- 456 6. Bright, A., Denholm, J., Coulter, C., Waring, J., & Stapledon, R. Tuberculosis  
457 notifications in Australia, 2015-2018. *Commun Dis Intell.* 2020;44:1–39.

- 458 7. World Health Organisation. Strengthening TB surveillance. [Internet]. 2022 [cited 2022  
459 Jun 26]. Available from: [https://www.who.int/westernpacific/activities/strengthening-](https://www.who.int/westernpacific/activities/strengthening-tb-surveillance)  
460 [tb-surveillance](https://www.who.int/westernpacific/activities/strengthening-tb-surveillance)
- 461 8. Australian Bureau of Statistics. 3107.0.55.006 - Information Paper: Population  
462 Concepts, 2008 [Internet]. Australian Bureau of Statistics.; 2008 [cited 2021 Jan 12].  
463 Available from:  
464 [https://www.abs.gov.au/AUSSTATS/abs@.nsf/Lookup/3107.0.55.006Glossary12008?O](https://www.abs.gov.au/AUSSTATS/abs@.nsf/Lookup/3107.0.55.006Glossary12008?OpenDocument)  
465 [penDocument](https://www.abs.gov.au/AUSSTATS/abs@.nsf/Lookup/3107.0.55.006Glossary12008?OpenDocument)
- 466 9. Moyo N, Tay EL, Nolan A, Graham HR, Graham SM, Denholm JT. TB contact tracing for  
467 young children: an Australian cascade of care review. *Public Health Action*.  
468 2021;11(2):91–6.
- 469 10. Dale KD, Tay EL, Trauer JM, Trevan PG, Denholm JT. Comparing tuberculosis  
470 management under public and private healthcare providers: Victoria, Australia, 2002-  
471 2015. *BMC Infect Dis*. 2017;17(1):324–324.
- 472 11. Australian Government Department of Health. Tuberculosis case definition [Internet].  
473 Australian Government Department of Health; 2010 [cited 2022 Apr 12]. Available  
474 from: [https://www1.health.gov.au/internet/main/publishing.nsf/Content/cda-surveil-](https://www1.health.gov.au/internet/main/publishing.nsf/Content/cda-surveil-nndss-casedefs-cd_tb.htm)  
475 [nndss-casedefs-cd\\_tb.htm](https://www1.health.gov.au/internet/main/publishing.nsf/Content/cda-surveil-nndss-casedefs-cd_tb.htm)
- 476 12. VAN WYK SS, ENARSON DA, BEYERS N, LOMBARD C, HESSELING AC. Consulting private  
477 health care providers aggravates treatment delay in urban South African tuberculosis  
478 patients. *Int J Tuberc Lung Dis*. 2011;15(8):1069–76.

- 479 13. Wallace RM, Armstrong LR, Pratt RH, Kammerer JS, Iademarco MF. Trends in  
480 Tuberculosis Reported From the Appalachian Region: United States, 1993-2005. *J Rural*  
481 *Health*. 2008;24(3):236–43.
- 482 14. ABUBAKAR I, CROFTS JP, GELB D, STORY A, ANDREWS N, WATSON JM. Investigating  
483 urban–rural disparities in tuberculosis treatment outcome in England and Wales.  
484 *Epidemiol Infect*. 2007;136(1):122–7.
- 485 15. Toms C, Stapledon R, Waring J, Douglas P. Tuberculosis notifications in Australia, 2012  
486 and 2013. *Commun Dis Intell*. 2015;39(2):E217–35.
- 487 16. Dale KD, Trauer JM, Dodd PJ, Houben RMGJ, Denholm JT. Estimating Long-term  
488 Tuberculosis Reactivation Rates in Australian Migrants. *Clin Infect Dis*.  
489 2020;70(10):2111–8.
- 490 17. Bello S, Afolabi RF, Ajayi DT, Sharma T, Owoeye DO, Oduyoye O, et al. Empirical  
491 evidence of delays in diagnosis and treatment of pulmonary tuberculosis: systematic  
492 review and meta-regression analysis. *BMC Public Health*. 2019;19(1):820–820.
- 493 18. Williams E, Cheng AC, Lane GP, Guy SD. Delays in presentation and diagnosis of  
494 pulmonary tuberculosis: a retrospective study of a tertiary health service in Western  
495 Melbourne, 2011–2014. *Intern Med J*. 2018;48(2):184–93.

496

497

**Fig 1. The flow of patients through the study**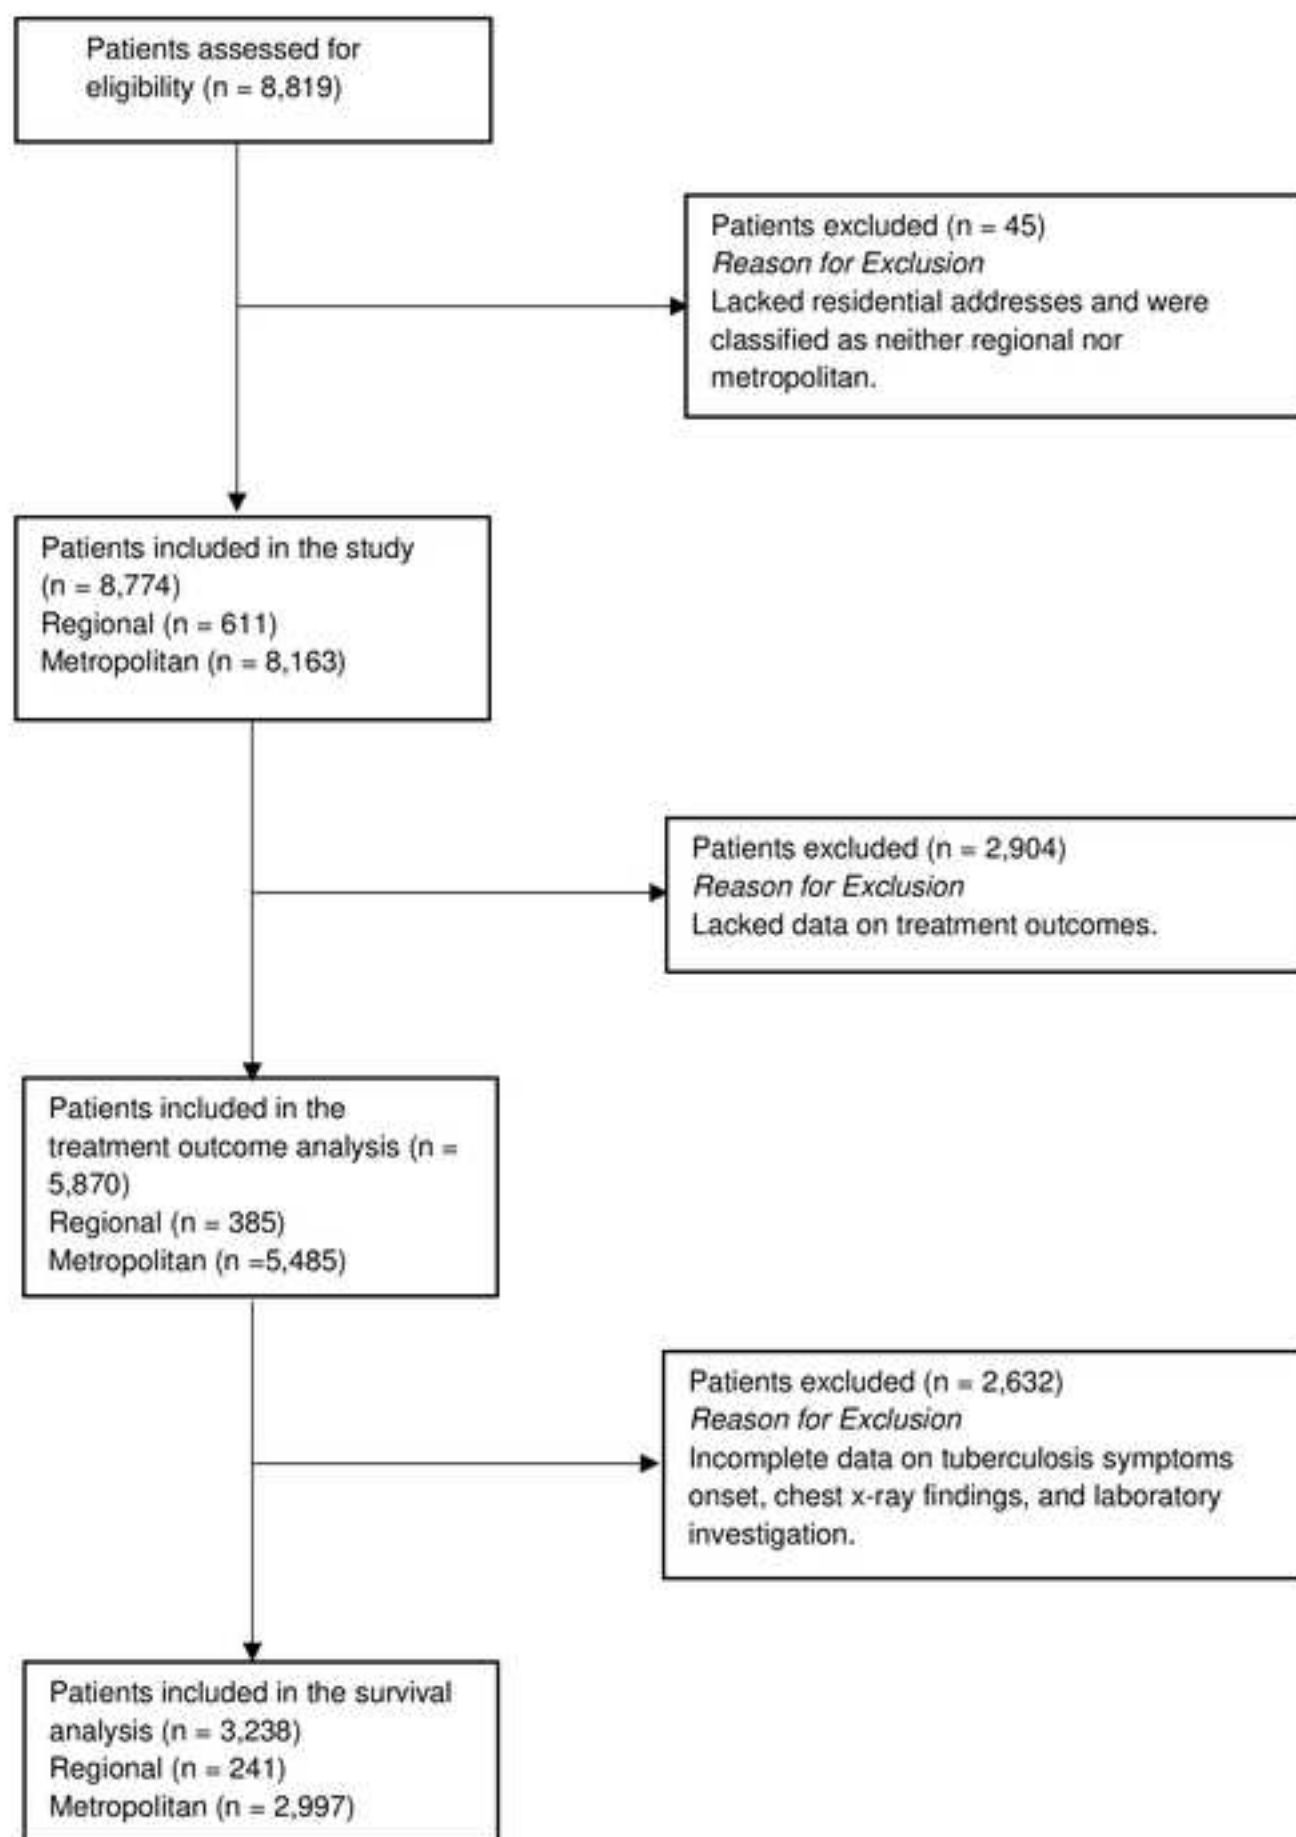

**Fig 2. Tuberculosis cases in regional Victoria by years of notification, age and country of birth from 1995 to 2019.**

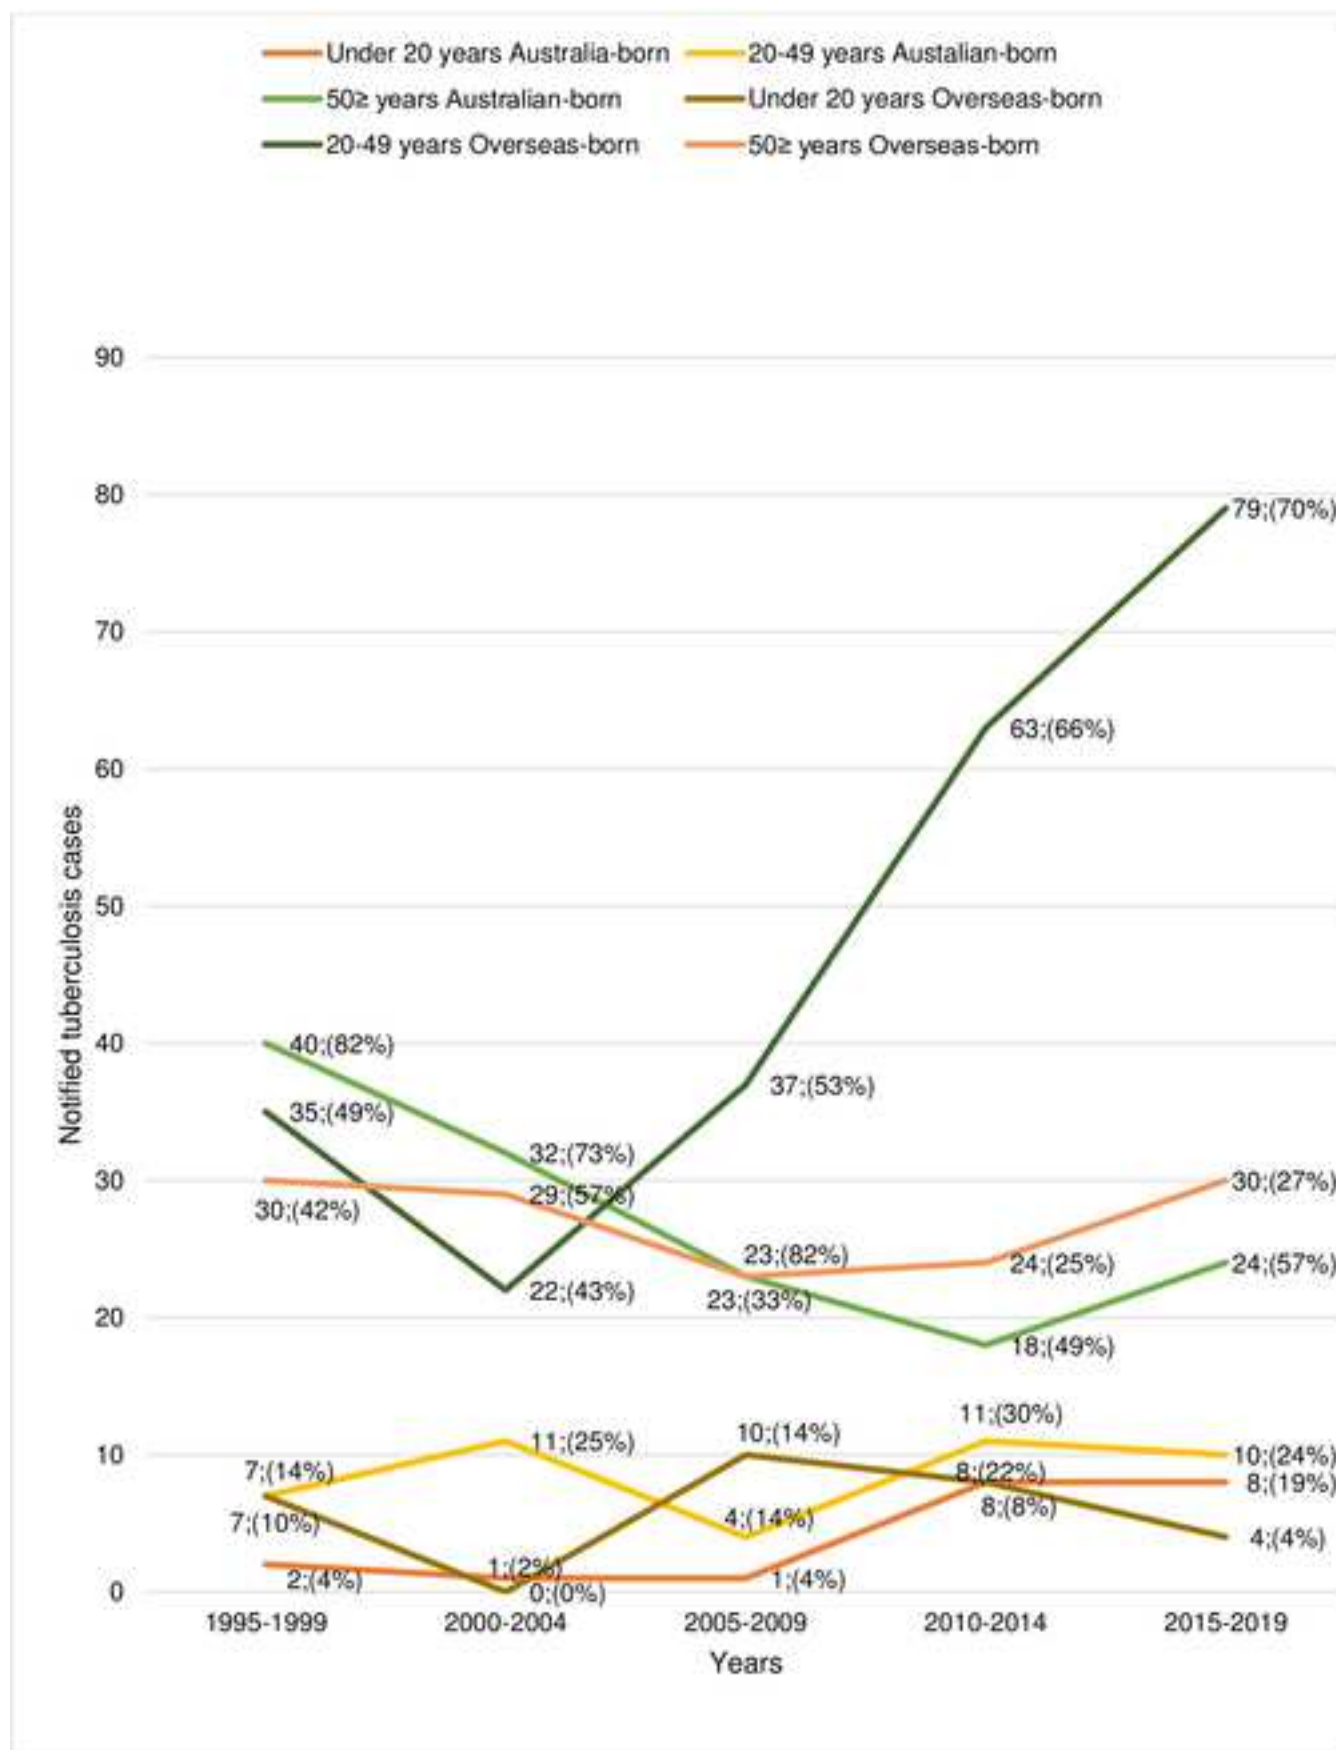

**Fig 3. Notified cases of tuberculosis in overseas-born people in regional Victoria from 1995-2019 by the number of years since arrival in Australia.**

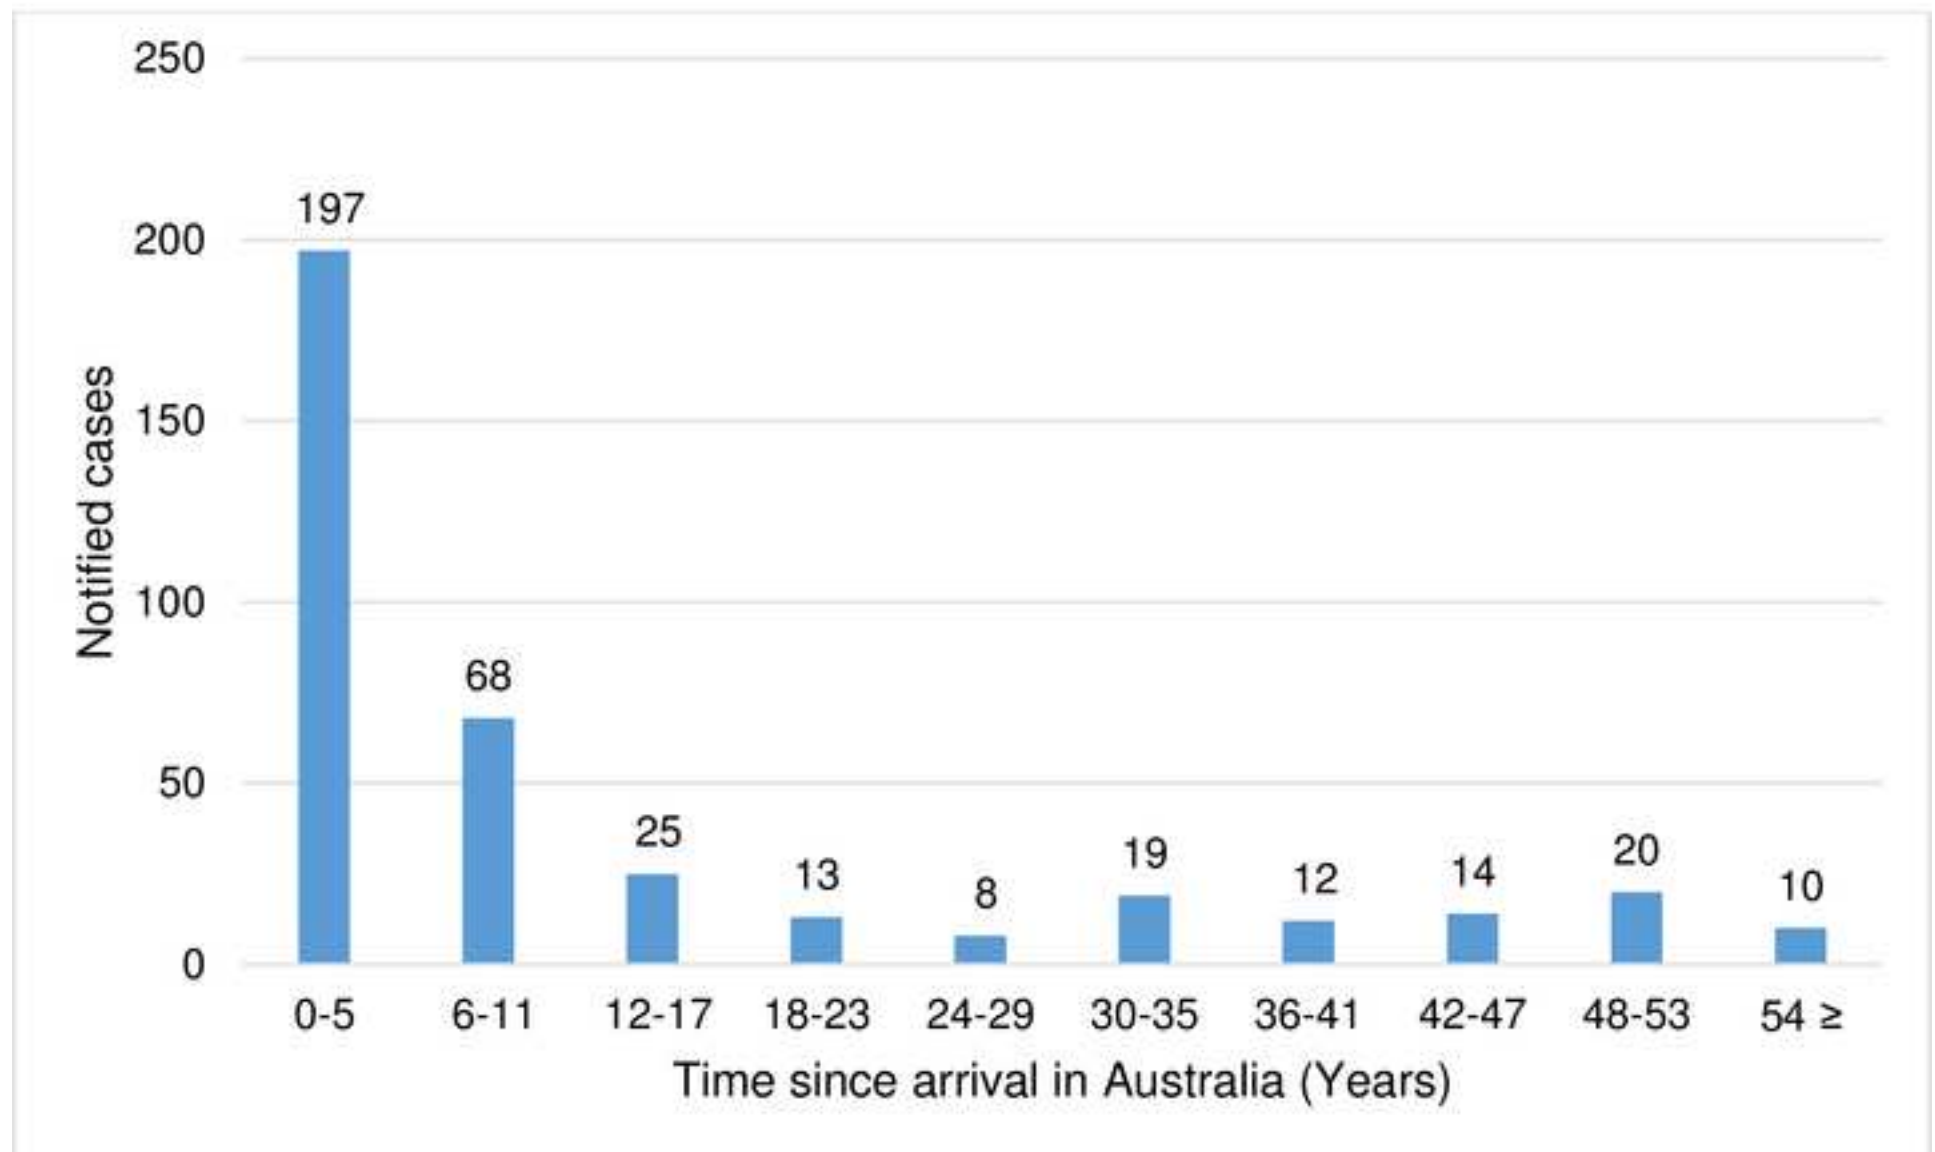

**Fig 4. Notified cases of tuberculosis in regional Victoria for overseas-born people from 1999 to 2019, by country of birth.**

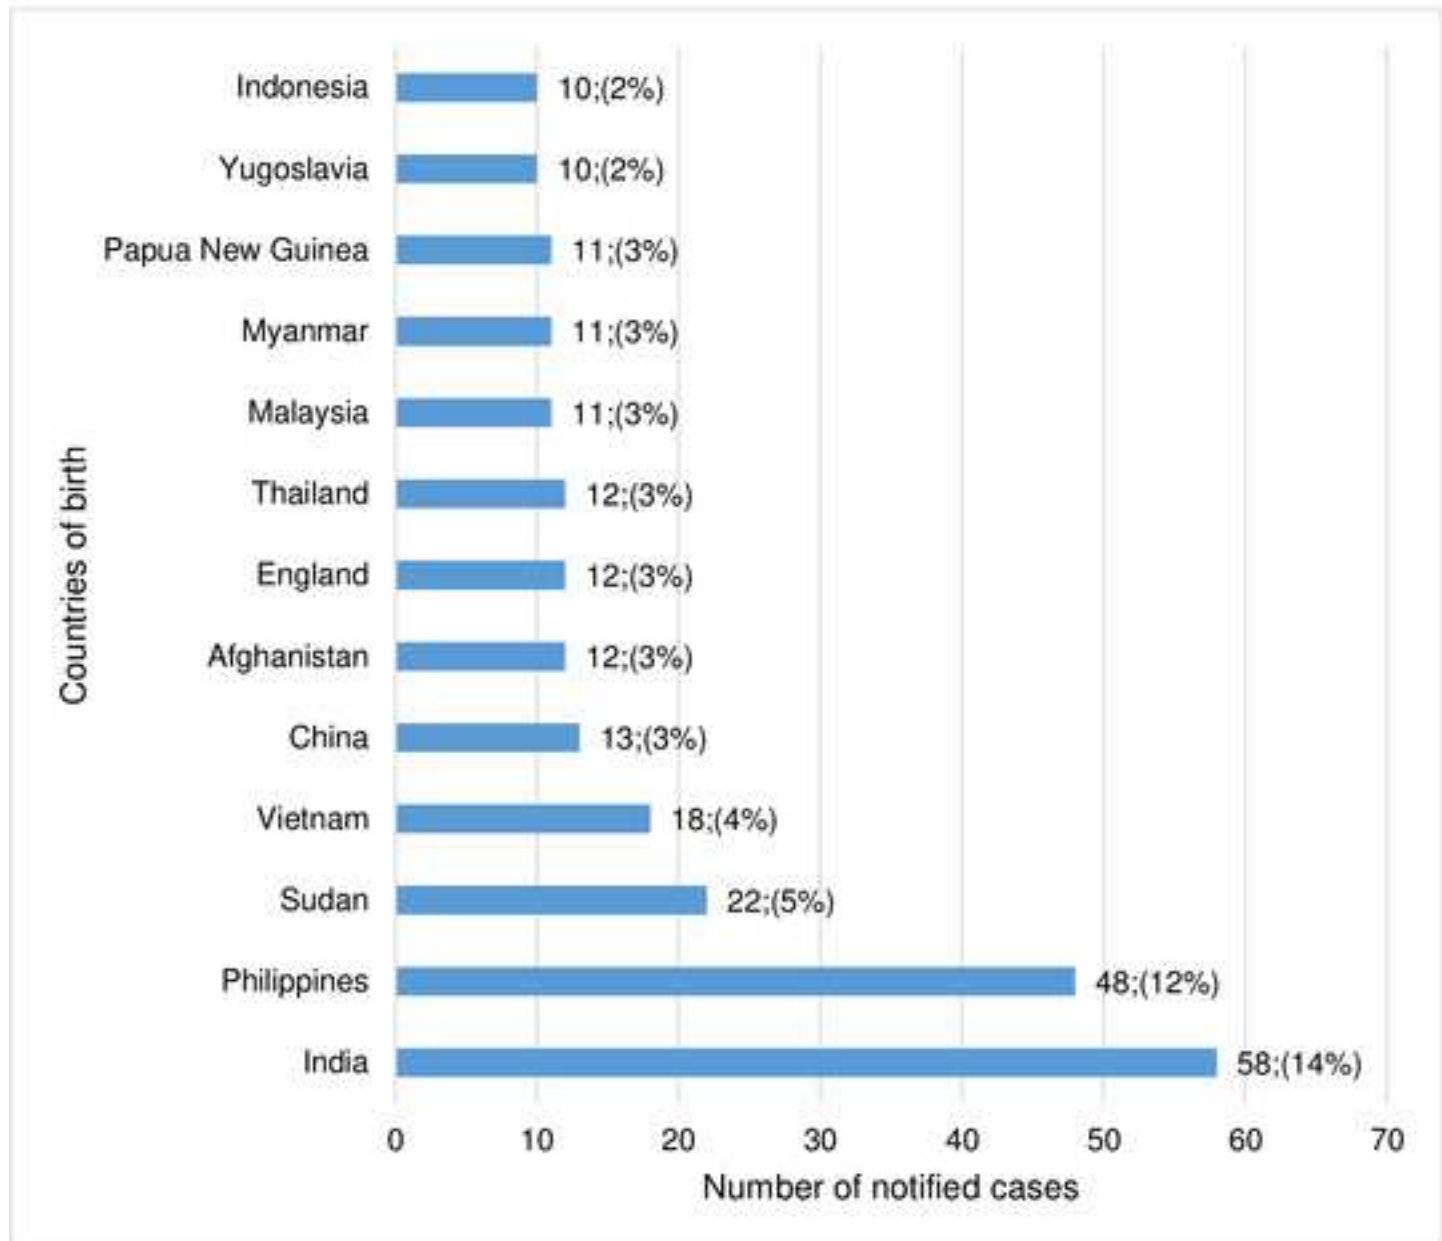

Notes: Yugoslavia no longer exist.

**Fig 5. Kaplan-Meier curves in tuberculosis patients in Victoria, Australia, from 2012 to 2019. Black = regional and grey = metropolitan.**

**Diagnostic delay to first CXR for patients with pulmonary involvement**

**Health system delay for patients with extrapulmonary tuberculosis**

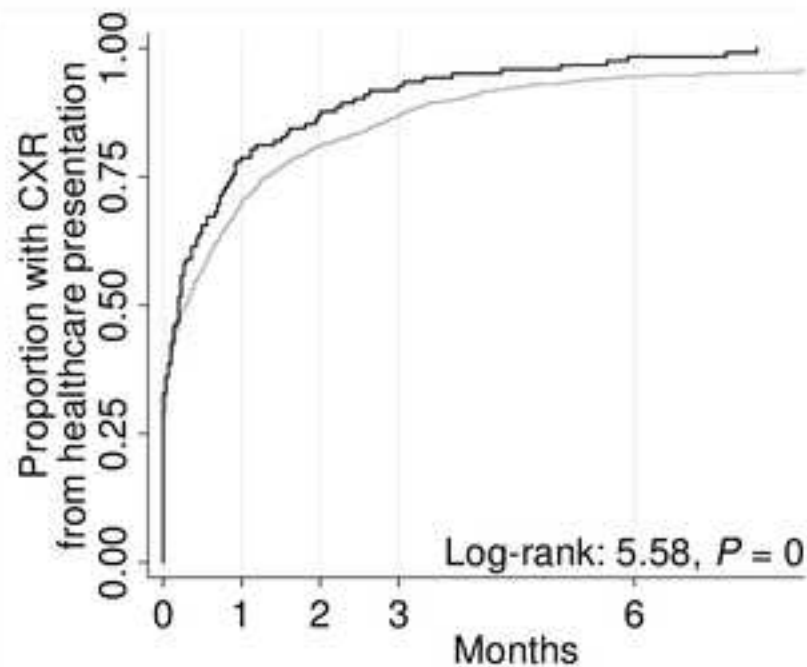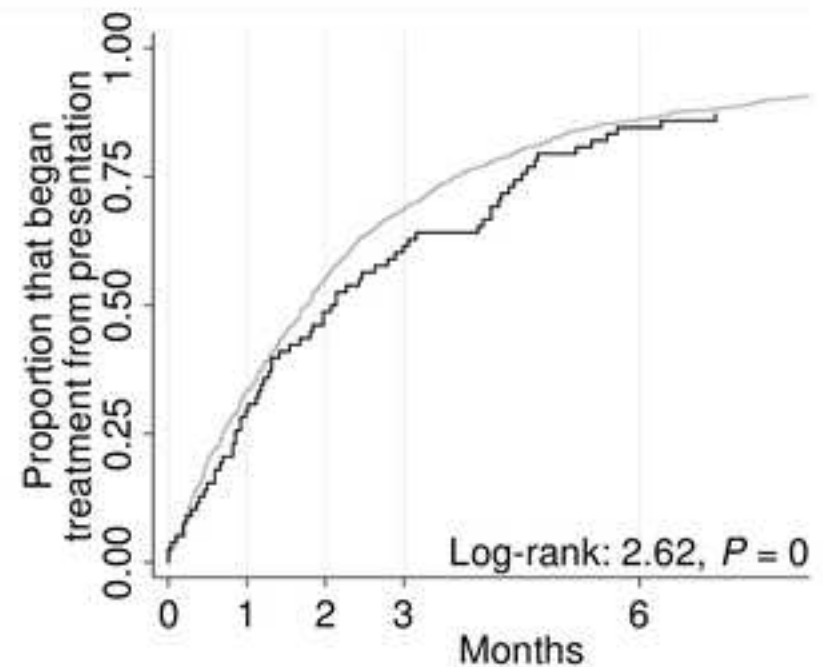





Click here to access/download

**Supporting Information**

TB notifications in regional Victoria PLOS ONE  
SI\_1.docx

1 **Tuberculosis notifications in regional Victoria, Australia:**  
2 **implications for public health care in a low incidence setting**

3

4 Moyo N<sup>1, 2\*</sup>, Tay EL<sup>3</sup>, Trauer JM<sup>1, 4</sup> Burke L<sup>1</sup>, Jackson J<sup>5, 6</sup>, Commons RJ<sup>7, 8</sup>, Boyd SC<sup>9</sup>, Singh  
5 KP<sup>10</sup>, Denholm JT<sup>1, 10</sup>

6

7 <sup>1</sup> Victorian Tuberculosis Program, Melbourne Health, Melbourne, Victoria, Australia

8 <sup>2</sup> La Trobe University, School of Nursing and Midwifery, Melbourne, Victoria, Australia

9 <sup>3</sup> Communicable Diseases Epidemiology and Surveillance Unit, Health Protection Branch,  
10 Public Health Division, Department of Health, Victoria, Australia

11 <sup>4</sup> Monash University, School of Public Health and Preventive Medicine, Melbourne, Victoria,  
12 Australia

13 <sup>5</sup> Department of Medicine, Albury-Wodonga Health, Wodonga, Victoria, Australia

14 <sup>6</sup> Faculty of Medicine, University of New South Wales Rural Clinical School, Albury Campus,  
15 New South Wales, Australia

16 <sup>7</sup> Internal Medicine Services, Ballarat Health Services, Ballarat, Victoria, Australia

17 <sup>8</sup> Global and Tropical Health Division, Menzies School of Health Research and Charles Darwin  
18 University, Darwin, Northern Territory, Australia

19 <sup>9</sup> Royal Brisbane and Women's Hospital, Brisbane, South Australia, Australia

20 <sup>10</sup> Department of Infectious Diseases, Doherty Institute for Infection and Immunity,  
21 University of Melbourne, Parkville, Victoria, Australia

22

23 \* [nompiloo@yahoo.com](mailto:nompiloo@yahoo.com)

24

## 25 **Abstract**

26       Background: Regionality is often a significant factor in tuberculosis (TB) management and  
27 outcomes worldwide. A wide range of context-specific factors may influence these  
28 differences and change over time. We compared TB treatment in regional and metropolitan  
29 areas, considering demographic and temporal trends affecting TB diagnosis and outcomes.  
30 Methods: Retrospective analyses of data for patients notified with TB in Victoria, Australia,  
31 were conducted. **The study outcomes were treatment delays and treatment outcomes.**  
32 Multivariable Cox proportional hazard model analyses were performed to investigate the  
33 effect of regionality in the management of TB. Six hundred and eleven (7%) TB patients were  
34 notified in regional and 8,163 (93%) in metropolitan areas between 1995 and 2019. Of the  
35 611 cases in the regional cohort, 401 (66%) were overseas-born. Fifty-one percent of the  
36 overseas-born patients in regional Victoria developed TB disease within five years of arrival  
37 in Australia. **Four cases of multidrug-resistant tuberculosis were reported in regional areas,**  
38 **compared to 97 cases in metropolitan areas. A total of 3,238 patients notified from 2012 to**  
39 **2019 were included in the survival analysis. Patient follow-up was censored at the first visit**  
40 **to the health care facility (Patient treatment delay) and at the initiation of TB treatment**  
41 **(Health system delay).** Patient, health system, and treatment delays were similar in regional  
42 and metropolitan areas for cases with pulmonary involvement. Cases with extrapulmonary  
43 TB in regional areas have a non-significantly longer healthcare system delay than patients in  
44 metropolitan (median 64 days versus 54 days, AHR = 0.8, 95% CI 0.6-1.0, P = 0.094).

45       Conclusion: Tuberculosis in regional Victoria is common among the overseas-born  
46 population, and patients with extrapulmonary TB in regional areas experienced a non-  
47 significant minor delay in treatment commencement with no apparent detriment to

48 treatment outcomes. Improving access to LTBI management in regional areas may reduce  
49 the burden of TB.

50 **Keywords:** regional, metropolitan, tuberculosis, treatment completion, delayed diagnosis

51

52 **Word count:** 3,715 words, excluding tables and references.

53

## 54 **Background**

55

56 Victoria is the second most highly populated state in Australia, with 6.69 million residents  
57 as of March 2020 [1]. It has the highest population growth rate (1.8%), with net overseas  
58 migration functioning as the primary contributor to population growth in Victoria [1].

59 Victoria is divided into two distinct socio-geographic areas, metropolitan and regional.  
60 Metropolitan is defined as the 31 local government areas of the city of Melbourne, while  
61 the 48 local government areas outside of the city are defined as regional. Based on 2016  
62 census data, 4,485,211 of Victoria's total population of 5,926,624 lived within Melbourne,  
63 with less than 25% of the population living regionally [2]. This equates to an average  
64 population density of 500 people per square kilometre in metropolitan Victoria compared to  
65 an average of 6 people per square kilometre in regional Victoria.

66 There are some differences in the provision of health care services between  
67 Victoria's metropolitan and regional areas. Unlike patients in most metropolitan areas,  
68 patients in regional Victoria may reside a considerable distance from hospitals. Most  
69 regional hospitals do not have negative pressure rooms for isolating TB patients during their  
70 infectious stage; therefore, infectious patients need to be transferred to metropolitan  
71 hospitals. Some regional hospitals have no on-site TB specialist medical practitioners, and

72 because of the distance from the hospital, there are very few opportunities for home visits  
73 from Victorian Tuberculosis Program specialist nursing staff, so regional patients must rely  
74 on telephone or video consultations for their diagnostic and follow-up consultations as well  
75 as their treatment supervision visits. The Victorian Tuberculosis Program (VTP) is Victoria's  
76 state-wide provider and coordinator of tuberculosis control.

77 In regional Victoria, the number of people born overseas is increasing. For example, in  
78 the 2006 census, there were 1,964 Indian-born people recorded as living in regional Victoria,  
79 which grew to 8,592 persons in 2016; similarly, the Philippines-born population was 2,700 in  
80 2006 and 6,085 in 2016 [2]. The Australian Government has made changes to  
81 Commonwealth immigration policy intended to stimulate economic growth outside  
82 metropolitan areas in recent years. These various changes are focused on attracting  
83 migrants and international students to regional areas [3]. Historically, most migrants to  
84 Victoria have settled in the capital city of Melbourne, with many coming from countries with  
85 high TB incidence, such as India, the Philippines, and Sudan [4,5]. Such changes to policy  
86 influence migration patterns and may impact the distribution of TB cases within Victoria,  
87 which may also have implications for optimising health service delivery models [5].

88 TB incidence in Victoria remains low, with 436 TB cases notified in 2018, representing 6.9  
89 cases per 100,000 population [6]. In Australia, research to date has tended to focus on  
90 metropolitan areas, where case numbers typically predominate. **Understanding TB  
91 treatment delays among regional patients provides important insights into VTP performance  
92 and is a critical step towards tuberculosis elimination. Globally, TB surveillance data have  
93 been recognised as an important data source for assessing the disease burden and  
94 epidemiological trends in TB [7]. Evaluating treatment outcomes and delays in regional**

95 **areas will inform practice and policy.** We aimed to describe notified TB cases in regional  
96 Victoria from 1995 to 2019, including trends and outcomes over these 24 years.

97

## 98 **Methods**

### 99 **Data Source**

100 We used routinely collected TB surveillance data. Data for all notified active tuberculosis  
101 cases in Victoria are collected by the VTP nurse consultants. Data are stored electronically in  
102 the Public Health Events Surveillance System (PHESS). PHESS is a centralised surveillance  
103 database containing data on all notifiable diseases in Victoria since 1991 [6]. The notification  
104 of active tuberculosis cases is mandatory in Victoria under the Public Health and Wellbeing  
105 legislation [6]. PHESS has standardised data collection templates to ensure consistency.  
106 Nurse consultants record patient demographic, clinical data and TB contacts in PHESS.

107 Data on the estimated resident population for all local government areas were obtained  
108 from the Australian Bureau of Statistics (ABS). The estimated resident population is the  
109 official figure of Australia's population based on the concept of "usual residence" and refers  
110 to all people, regardless of nationality or citizenship, who usually live in Australia, except  
111 foreign diplomatic personnel and their families [8].

### 112 *Study design*

113 We conducted a respective cohort study. Patients notified to the Australian department  
114 of health with active TB from 1995 to 2019 were identified. We analysed the data of these  
115 patients from the time they first developed TB symptoms until they completed TB  
116 treatment. Our study adhered to the Strengthening The Reporting of Observational Studies  
117 in Epidemiology (STROBE) guidelines (see S7 Table).

118

119 *Study setting*

120 The fieldwork for this study was conducted in Victoria by the VTP staff. Funded by the  
121 Victorian Government Department of Health, VTP is a centralised program located in  
122 metropolitan Victoria and works in partnership with hospitals and clinics in  
123 managing tuberculosis. All tuberculosis patients in Victoria are supervised by VTP nurse  
124 consultants [9,10].

125 *Study Population*

126 The population for this study included all people of all ages who had been diagnosed with  
127 tuberculosis and notified to the department of health.

128 *Inclusion criteria.*

129 Patients were included in the study if they met the following inclusion criteria:

- 130 1. Diagnosed with TB in Victoria and notified to the Victorian department of health  
131 from 1 January 1995 to 31 December 2019. TB cases were defined in accordance  
132 with a standard national case definition based on either laboratory definitive  
133 evidence requiring isolation of Mycobacterium tuberculosis complex by culture or  
134 nucleic acid testing or clinical diagnosis accompanied by treatment [11].
- 135 2. Having received tuberculosis treatment in Victoria.

136

137 *Exclusion criteria.*

138 Patients were excluded from the study if they:

- 139 1. were notified before 1995 or after 2019
- 140 2. Lacking residential addresses

141

142

143 *Variables*

144 The dependent variables were the treatment delays and the treatment outcomes (study  
145 outcomes). Treatment outcomes included completed treatment, lost to follow up, died of  
146 TB, died of other causes during treatment for TB, and transferred interstate or overseas. For  
147 the treatment delays, we adapted the definitions outlined by Van Wyk et al. [12], which  
148 proposed that: 'Patient treatment delay' is the period (in the number of days) between the  
149 onset of any self-reported TB symptoms and the first visit to a health care facility. 'Health  
150 system delay' is the period (in the number of days) between the first health care facility visit  
151 and initiation of TB treatment. 'Diagnostic delay' is defined as the period (in the number of  
152 days) between the onset of any self-reported TB-related symptoms and the time a chest x-  
153 ray was performed. 'Treatment initiation delay' was the period between a positive specimen  
154 (TB confirmed) and treatment initiation.

155 We also extracted the following independent variables from PHESS, (1) demographic  
156 data: age (age groups in years), sex (male or female), country of birth (name of the  
157 country), Aboriginal and Torres Strait Islander status (Aboriginal and/or Torres Strait  
158 Islander or not Aboriginal and/or Torres Strait Islander), local government areas (local  
159 government area), self-reported residency status (Australian-born, permanent resident,  
160 refugee/humanitarian, visitor, overseas student, other and unknown status), and for  
161 overseas-born cases, year of arrival in Australia (year). (2) Clinical characteristics: year  
162 of tuberculosis notification (year), the manifestation of tuberculosis (pulmonary,  
163 extrapulmonary or both), chest X-ray results (abnormal, cavitation or normal), laboratory  
164 results (smear, culture, or gene expert), and treatment outcome (died of TB, died of other  
165 causes during treatment for TB, completed treatment, lost to follow up, and transferred  
166 interstate or overseas).



167

**168 Ethical considerations**

169 Approval from a Human Research Ethics Committee for this study was not required as  
170 the data were collected for the purposes of public health action, as defined in the Public  
171 Health and Wellbeing Act 2008 and were considered as being for quality assurance and  
172 auditing purposes. Patients were informed of the purpose of data collection and consented  
173 to their data being used for tuberculosis surveillance and medical research at the time of  
174 collection. All data were fully anonymised during the data extraction process. For example,  
175 participants' names, phone numbers, addresses, and birth dates were removed. Patient  
176 identification numbers, postcodes, and gender were coded. Age was changed to age group.  
177 In the publications that come from this study, patients will remain anonymous.

178

**179 Data analysis**

180 Data cleaning and analyses were conducted using STATA version 14.

181

*182 Managing missing data*

183 We used a listwise deletion method when missing data contained residential addresses  
184 (participants were allocated neither to regional nor metropolitan areas) because our  
185 exposure of interest was regionality. When missing data did not have the key variable (i.e.,  
186 residential address), we utilised the pairwise deletion approach, which allowed us to retain  
187 data and reduce the possibility of selection bias.

188

*189 Analysis*

190 Descriptive and multivariable analyses were performed. Incidence rates were calculated  
191 using the mid-year estimated resident population. Pearson's  $\chi^2$  test was used to test the  
192 association between categorical variables. A two-tailed p-value of  $<0.05$  was considered  
193 statistically significant. In logistic regression, we compared complete treatment with death,  
194 irrespective of the cause, lost to follow-up and transferred interstate or overseas. Died of TB  
195 was compared with completed treatment, lost to follow-up, died of other causes during  
196 treatment for TB, and transferred interstate or overseas.

197 We included all independent variables in all multivariable analyses because we believed  
198 they could all affect the outcomes. Our variable of interest was regionality. The  
199 proportional-hazards assumption was assessed using Kaplan-Meier survival curves by  
200 including time-dependent covariates in the model and with Schoenfeld residuals. In cases  
201 where proportionality assumptions were not met, analyses were stratified. Kaplan-Meier  
202 survival curves were used to show various delays in presentation, diagnosis, and treatment  
203 between regional and metropolitan cohorts, and Cox proportional hazard analyses were  
204 performed to assess these delays. Patient follow-up was censored, 1. at the first visit to a  
205 health care facility (Patient treatment delay), 2. at the initiation of TB treatment (Health  
206 system delay), 3. at the time a chest x-ray was performed (Diagnostic delay), 4. at the  
207 treatment initiation (Treatment initiation delay).

208 Because of limited previous data, treatment outcomes were analysed using data from 2005  
209 to 2019, and for the analysis of treatment delays, we used data from 2012 to 2019.

210

211

212

213 **Results**

214 A total of 8,819 TB cases were notified to the Victorian Government Department of  
215 Health between 1995 and 2019. Among the 8,819 cases, 611 (7%) were recorded in regional  
216 areas, 8,163 (93%) in metropolitan areas of Victoria and 45 (1%) had neither regional nor  
217 metropolitan residential addresses (see Fig 1). Forty-five cases with no residential addresses  
218 were excluded from the study as they were classified as neither regional nor metropolitan.

219 Of the 611 people in regional areas, 343 (56%) were male, 401 (66%) were overseas-born,  
220 and for 10 cases (2%), there was no country of birth recorded. Among the 8,163 TB cases in  
221 metropolitan areas, 4,316 (53%) were male, 8 (0.1%) had no gender reported and 7,375  
222 (90%) were overseas-born.

223 **Fig 1. The flow of patients through the study**

224

225 Data recorded before 2005 had missing treatment outcomes for many cases and were  
226 therefore excluded from the analysis of treatment outcomes (Fig 1). The overall treatment  
227 completion rates were similar among the regional and metropolitan cohorts: 85% and 90%,  
228 respectively.

229 Table 1 describes the characteristics of notified TB cases in Victoria from 1995 to 2019 by  
230 location of residence and birth. The proportion of overseas-born cases in the regional cohort  
231 was 66% compared to 90%, in metropolitan areas. The 25 to 34 age group had the largest  
232 proportion of cases in both regional and metropolitan areas. In this age bracket, there were  
233 27% of overseas-born and 8% of Australian-born cases in regional settings, and 31% of  
234 overseas-born and 11% of Australian born cases in metropolitan areas. The proportions of  
235 multidrug-resistant TB (MDR-TB) cases among the regional and metropolitan patients were

236 similar. The four MDR-TB cases reported in the regional cohort all occurred in people born  
237 overseas. In the metropolitan cohort, the proportion of MDR-TB cases was the same (1%)  
238 amongst overseas and Australian-born persons. Extensive drug-resistant TB (0.03%) and  
239 genotypic rifampicin-resistant TB (0.04%) were only reported in the metropolitan area  
240 among overseas-born cases.

241

242

243

244

245

246

247

248

249

250

251

252

253

254

255

256

257

258

259

260 **Table 1. Characteristics of the notified cases of Tuberculosis in Victoria from 1995 to 2019.**

| Variable                      |                                                      | Regional (n = 601)         |                 |                              |                 | Metropolitan (n = 8,163)     |                 |                              |                 |
|-------------------------------|------------------------------------------------------|----------------------------|-----------------|------------------------------|-----------------|------------------------------|-----------------|------------------------------|-----------------|
|                               |                                                      | Overseas-born<br>(n = 401) |                 | Australian-born<br>(n = 200) |                 | Overseas-born<br>(n = 7,375) |                 | Australian born<br>(n = 788) |                 |
|                               |                                                      | Total                      | Proportion<br>% | Total                        | Proportion<br>% | Total                        | Proportion<br>% | Total                        | Proportion<br>% |
| Gender                        | Male                                                 | 215                        | 54              | 123                          | 62              | 3,869                        | 52              | 447                          | 57              |
|                               | Female                                               | 186                        | 46              | 77                           | 39              | 3,500                        | 47              | 339                          | 43              |
|                               | Unknown                                              | 0                          | 0               | 0                            | 0               | 6                            | 0               | 2                            | 0               |
| Age group                     | Under 5                                              | 3                          | 1               | 11                           | 6               | 31                           | 0               | 115                          | 15              |
|                               | 5-14                                                 | 12                         | 3               | 7                            | 4               | 122                          | 2               | 79                           | 10              |
|                               | 15-24                                                | 49                         | 12              | 14                           | 7               | 1,303                        | 18              | 129                          | 16              |
|                               | 25-34                                                | 110                        | 27              | 15                           | 8               | 2,272                        | 31              | 87                           | 11              |
|                               | 35-44                                                | 60                         | 15              | 10                           | 5               | 1,188                        | 16              | 60                           | 8               |
|                               | 45-54                                                | 49                         | 12              | 15                           | 8               | 715                          | 10              | 67                           | 9               |
|                               | 55-64                                                | 33                         | 8               | 31                           | 16              | 562                          | 8               | 56                           | 7               |
|                               | 65 and above                                         | 85                         | 21              | 97                           | 49              | 1,181                        | 16              | 195                          | 25              |
|                               | Unknown                                              | 0                          | 0               | 0                            | 0               | 1                            | 0               | 0                            | 0               |
|                               | Manifestation                                        | Pulmonary                  | 193             | 48                           | 131             | 66                           | 2,864           | 39                           | 459             |
| Pulmonary Plus<br>other sites |                                                      | 42                         | 10              | 18                           | 9               | 936                          | 13              | 117                          | 15              |
| Extra Pulmonary               |                                                      | 162                        | 40              | 49                           | 25              | 3,396                        | 46              | 206                          | 26              |
| Unknown                       |                                                      | 4                          | 1               | 2                            | 1               | 179                          | 2               | 6                            | 1               |
| Susceptibility                | Fully sensitive                                      | 233                        | 58              | 117                          | 59              | 4,376                        | 59              | 402                          | 51              |
|                               | Multidrug -<br>resistant<br>tuberculosis             | 4                          | 1               | 0                            | 0               | 88                           | 1               | 9                            | 1               |
|                               | Other resistance                                     | 12                         | 3               | 2                            | 1               | 379                          | 5               | 29                           | 4               |
|                               | Extensively drug-<br>resistant<br>tuberculosis       | 0                          | 0               | 0                            | 0               | 2                            | 0               | 0                            | 0               |
|                               | Genotypic<br>Rifampicin<br>resistant<br>tuberculosis | 0                          | 0               | 0                            | 0               | 3                            | 0               | 0                            | 0               |
|                               | Unknown                                              | 152                        | 38              | 81                           | 41              | 2,527                        | 34              | 348                          | 44              |

|                                   |                                                   |     |    |    |    |       |    |     |    |
|-----------------------------------|---------------------------------------------------|-----|----|----|----|-------|----|-----|----|
| Treat outcome (from 2005 to 2019) | Completed treatment                               | 238 | 86 | 88 | 82 | 4,491 | 90 | 442 | 92 |
|                                   | Lost to follow-up                                 | 5   | 2  | 4  | 4  | 106   | 2  | 8   | 2  |
|                                   | Died from other cause                             | 12  | 4  | 12 | 11 | 128   | 3  | 22  | 5  |
|                                   | Died of tuberculosis                              | 4   | 1  | 3  | 3  | 58    | 1  | 5   | 1  |
|                                   | Still on treatment at the time of data extraction | 1   | 0  | 0  | 0  | 1     | 0  | 0   | 0  |
|                                   | Transferred interstate or overseas                | 18  | 6  | 0  | 0  | 222   | 4  | 1   | 0  |
|                                   | Unknown                                           | 0   | 0  | 0  | 0  | 1     | 0  | 0   | 0  |

261 Note: Treatment outcome regional, n = 385 and Metro, n = 5,485.

262

263 The number of tuberculosis cases in regional Victoria has fluctuated over time, with 129

264 notified from 1995 to 1999, 97 from 2000 to 2004, and 155 from 2015 to 2019. Table 2

265 compares the TB incidence rate between regional and metropolitan areas. From 1995 to

266 1999, there were 129 cases with a mean incidence rate of 2.0, 95% CI 1.3-2.7 per 100,000

267 population in regional Victoria, while in the metropolitan there were 1,271 cases with a

268 mean incidence rate of 7.7, 95% CI 6.9-8.4. The TB incidence in regional and metropolitan

269 areas is fluctuating; in the 2015 to 2019 period, the mean incidence for the regional cohort

270 was 2.1, 95% CI 1.5-2.7 and 7.9, 95% CI 7.3-8.4 in the metropolitan.

271

272

273

274

275

276

277 **Table 2. Tuberculosis incidence rate per 100,000 population in regional Victoria and**  
 278 **metropolitan Victoria from 1995 to 2019.**

| Years     | Regional areas     |                                                     | Metropolitan areas |                                                     |
|-----------|--------------------|-----------------------------------------------------|--------------------|-----------------------------------------------------|
|           | Tuberculosis cases | Mean incidence rate per 100,000 population (95% CI) | Tuberculosis cases | Mean incidence rate per 100,000 population (95% CI) |
| 1995-1999 | 129                | 2.0 (1.3-2.7)                                       | 1,271              | 7.7 (6.9-8.4)                                       |
| 2000-2004 | 97                 | 1.5 (1.0-1.9)                                       | 1,407              | 8.0 (7.6-8.4)                                       |
| 2005-2009 | 98                 | 1.4 (1.2-1.6)                                       | 1,742              | 9.1 (8.9-9.4)                                       |
| 2010-2014 | 132                | 1.8 (1.4-2.1)                                       | 1,841              | 8.7 (7.9-9.5)                                       |
| 2015-2019 | 155                | 2.1 (1.5-2.7)                                       | 1,902              | 7.9 (7.3-8.4)                                       |

279

280 TB cases among overseas-born people aged 20 to 49 years have rapidly increased since  
 281 2004 (Fig 2). Conversely, in the Australian-born population aged 20 to 49 years, cases have  
 282 remained stable since 1995. The number of TB cases among Australian-born people aged  
 283  $\geq 50$  years has decreased from 1995 and slightly upturned since 2014.

284 **Fig 2. Tuberculosis cases in regional Victoria by year of notification, age, and country of**  
 285 **birth from 1995 to 2019.**

286

287 A total of 386 overseas-born cases had their year of arrival in Australia recorded. Half of  
 288 the people (197; 51%) developed TB disease within five years of arrival in Australia. Out of  
 289 these 197 cases, 58 (29%) were permanent residents, 43 (22%) were refugees, 19 (10%)  
 290 were visitors, 18 (9%) were overseas students, and 59 (30%) had unknown residential  
 291 status. Among 19 overseas students, 18 developed TB within five years and one between six

292 and 11 years of arrival. Of the 46 refugees recorded in the study, 43 were diagnosed with TB  
293 within five years of arrival. The risk of developing TB remained for many years after people  
294 arrived in Australia; 10 (3%) people were diagnosed with TB after 53 years of arrival (see, Fig  
295 3).

296 **Fig 3. Notified cases of tuberculosis in the overseas-born people in regional Victoria from**  
297 **1995-2019 by the number of years since arrival in Australia.**

298

299 In 2016, the TB incidence rate for the Australian-born population was 0.5 per 100,000  
300 people and 12.0 per 100,000 people born overseas. Thirteen frequently reported countries  
301 of birth for the overseas-born cases from 1999 to 2019 are shown in Fig 4. People born in  
302 these 13 countries make up 62% of the overseas-born cases during the study period. India  
303 had the highest number of notified cases, 58 (14%), followed by the Philippines, 48 (12%).  
304 People born in India and the Philippines accounted for 26% of all the TB cases in regional  
305 areas.

306 **Fig 4. Notified cases of tuberculosis in regional Victoria for overseas-born people from**  
307 **1999 to 2019, by country of birth.**

308

309 Among 5,870 cases with known treatment outcomes, 5,259 (90%) completed treatment,  
310 124 (2%) were lost to follow-up, 174 (3%) died of another cause while on TB therapy, 70  
311 (1%) died of TB, 2 (0.03%) were still on treatment at the time of data extraction, and 241  
312 (4%) were transferred either interstate or overseas. Table 3 shows univariable and  
313 multivariable analyses of predictors of treatment completion and dying of TB. Living in a  
314 regional area was associated with lower odds of treatment completion on univariable  
315 analysis (OR = 0.6, 95% CI 0.5-0.8, P = 0.002). After adjusting for the effect of age, sex, drug



316 susceptibility and country of birth in the model, living in a regional area remained  
317 significantly associated with lower treatment completion (Adjusted OR [AOR] = 0.7, 95% CI  
318 0.5-0.9,  $P = 0.019$ ). On multivariable analysis, older age and male sex were also predictors of  
319 lower treatment completion.

320 Living in a regional area did not significantly increase the odds of dying from TB on  
321 univariable analysis (OR = 1.6, 95% CI 0.7-3.5,  $P = 0.244$ ). In a model that included all the five  
322 variables in the multivariable analysis, regionality was not associated with dying of TB (AOR  
323 = 1.8, 95% CI 0.7-4.2,  $P = 0.198$ ). Older age was significantly associated with dying of TB.

324

325

326

327

328

329

330

331

332

333

334

335

336

337

338

339

340 **Table 3. Univariable and multivariable analysis of predictors of treatment completion and**  
 341 **dying of tuberculosis from 2005 to 2019.**

| Variable                                                                                   | Treatment completion |         |                        |         | Died of tuberculosis |         |                        |         |
|--------------------------------------------------------------------------------------------|----------------------|---------|------------------------|---------|----------------------|---------|------------------------|---------|
|                                                                                            | Univariable analysis |         | Multivariable analysis |         | Univariable analysis |         | Multivariable analysis |         |
|                                                                                            | OR (95%)             | P value | AOR (95%)              | P value | OR (95%)             | P value | AOR (95%)              | P value |
| Regional<br>(reference<br>group:<br>metropolitan<br>cases)                                 | 0.6 (0.5-0.8)        | 0.002   | 0.7 (0.5-0.9)          | 0.019   | 1.6 (0.7-3.5)        | 0.244   | 1.8 (0.7-4.2)          | 0.198   |
| Age ≥ 65 years<br>(reference<br>group: age <<br>65 years)                                  | 0.2 (0.2-0.3)        | <0.0001 | 0.2 (0.2-0.3)          | <0.0001 | 12.6 (7.6-20.9)      | <0.0001 | 9.9 (5.8-16.9)         | <0.0001 |
| Male sex<br>(reference<br>group: female<br>sex)                                            | 0.6 (0.5-0.7)        | <0.0001 | 0.7 (0.6-0.8)          | <0.0001 | 1.8 (1.1-3.0)        | 0.020   | 1.5 (0.9-2.6)          | 0.131   |
| Drug resistant<br>tuberculosis<br>(reference<br>group: fully<br>sensitive<br>tuberculosis) | 0.8 (0.6-1.1)        | 0.228   | 0.8 (0.6-1.1)          | 0.128   | 1.7 (0.8-3.5)        | 0.179   | 1.9 (0.9-4.1)          | 0.104   |
| Overseas-born<br>(reference<br>group:<br>Australian-<br>born)                              | 0.9 (0.7-1.2)        | 0.415   | 0.7 (0.5-1.1)          | 0.094   | 0.9 (0.4-1.8)        | 0.682   | 1.8 (0.7-4.9)          | 0.238   |

342 Notes: AOR is an adjusted odds ratio.

343 The effect of regionality in multivariable Cox proportional hazard model analyses is

344 shown in Table 4. The model included age, sex, place of birth, place of residence, and drug

345 susceptibility. Data prior to 2012 were incomplete in relation to TB symptom onset, chest X-

346 ray findings and laboratory investigations and were therefore unable to be included in the  
 347 analyses of delay in TB diagnosis and treatment. A total of 241 cases in regional and 2,997 in  
 348 metropolitan areas were included.

349 Patient and health system delays were similar in regional and metropolitan areas for  
 350 cases with pulmonary involvement. In regional areas, people with pulmonary involvement  
 351 underwent chest x-ray (diagnostic delay) slightly sooner than those notified in metropolitan  
 352 areas (median six days versus nine days, AHR = 1.2, 95% CI 1.0-1.5, P = 0.047). Conversely,  
 353 healthcare system delay was non-significantly longer in regional than in metropolitan  
 354 patients (median 64 days versus 54 days, AHR = 0.8, 95% CI 0.6-1.0, P = 0.094).

355

356 **Table 4. Adjusted relationship between regionality in Cox regression models of delays in**  
 357 **the cascade of care among tuberculosis patients in Victoria from 2012 to 2019.**

| Time period<br>outcome                                       | Regional<br>area<br>Median<br>(interquartile<br>range) days | Metropolitan area<br>Median<br>(interquartile<br>range) days | Effect of regional in Cox regression analysis |                                       |                                      |         |
|--------------------------------------------------------------|-------------------------------------------------------------|--------------------------------------------------------------|-----------------------------------------------|---------------------------------------|--------------------------------------|---------|
|                                                              |                                                             |                                                              | Number<br>observed<br>in<br>regional          | Number<br>observed in<br>metropolitan | Adjusted<br>Hazard ratio<br>(95% CI) | P-value |
| Patient with<br>pulmonary<br>involvement                     |                                                             |                                                              |                                               |                                       |                                      |         |
| Patient delay                                                | 21 (1-76)                                                   | 24 (1-67)                                                    | 113                                           | 1,293                                 | 0.9 (0.8-1.1)                        | 0.389   |
| Health system<br>delay                                       | 21.5(7-44)                                                  | 25 (7-65)                                                    | 146                                           | 1,691                                 | 1.2 (1.0-1.4)                        | 0.102   |
| Diagnostic<br>delay:<br>Presentation to<br>First chest-x-ray | 6 (0-27)                                                    | 9 (0-41)                                                     | 122                                           | 1,343                                 | 1.2 (1.0-1.5)                        | 0.047   |

|                                                                       |             |             |     |       |               |       |
|-----------------------------------------------------------------------|-------------|-------------|-----|-------|---------------|-------|
| Treatment delay: First chest X-ray to start of tuberculosis treatment | 8 (3-23)    | 9 (3-29)    | 131 | 1,565 | 1.0 (0.9-1.3) | 0.614 |
| Extrapulmonary patients                                               |             |             |     |       |               |       |
| Patient delay                                                         | 11.5 (0-68) | 23 (0-75)   | 62  | 907   | 1.0 (0.7-1.2) | 0.756 |
| Health system delay                                                   | 64 (26-137) | 54 (21-112) | 78  | 1,107 | 0.8 (0.6-1.0) | 0.094 |
| Diagnostic delay: Presentation to First chest x-ray                   | 26 (5-92)   | 30 (5-72)   | 47  | 798   | 0.9 (0.7-1.2) | 0.393 |
| All patients                                                          |             |             |     |       |               |       |
| Treatment delay 2: specimen test to treatment initiation              | 7 (1-19)    | 5 (1-17)    | 151 | 1,996 | 1.0 (0.8-1.2) | 0.747 |

358

359 The Kaplan-Meier curves for patient delay are shown in Fig 5.

360 **Fig 5. Kaplan-Meier curves in tuberculosis patients in Victoria, Australia from 2012 to**

361 **2019.**

362

## 363 Discussion

364 We report the trends and treatment outcomes of notified TB cases in regional areas of

365 Victoria, Australia, from 1995 to 2019. The incidence of TB is low in regional areas, and this

366 is consistent with the findings from studies reported in the United States of America (USA)

367 and the United Kingdom. For example, a study in Appalachia, USA, reported that in 2005 the  
368 rate of tuberculosis in regional Appalachia was 2.1 compared to 2.7 per 100,000 population  
369 in metropolitan areas [13]. A similar study conducted in England and Wales from 2001 to  
370 2003 found that the rate of TB in metropolitan areas was 6.3-fold higher compared to  
371 regional areas [14].

372 We observed that there had been a slight increase in TB incidence in regional Victoria  
373 from 1995 to 2019. The increase in TB incidence in regional Victoria is not surprising  
374 considering the increase in people born in high TB incidence countries [2]. In the regional  
375 cohort, the proportion of TB among the overseas-born population was twice that of the  
376 Australia-born people. There is an increase in TB cases aged between 20 and 49 years  
377 among the overseas-born in the regional cohort. These results suggest there may be a public  
378 health benefit in increasing latent TB detection and treatment in regional areas, targeting  
379 20-49-year-old overseas-born people, and offering TB preventative therapy to those found  
380 with latent TB.

381 In regional Victoria, TB resistance was more common in overseas-born cases, consistent  
382 with other Australian studies [6,15]. We analysed the time from arrival in Australia to TB  
383 diagnosis for overseas-born cases in the regional cohort. More than half of the overseas-  
384 born cases were notified within five years of arrival in Australia. The high TB notification  
385 within the first five years of arrival may be attributed to the latent TB reactivation [16]. It is  
386 worth noting that the majority of the refugees were diagnosed within five years of arrival.  
387 This may be a result of more intensive screening soon after arrival, including testing for LTBI  
388 in asylum seekers but not migrants more generally. Refugees may also return overseas less  
389 frequently than other migrants and be less likely to be reinfected.

390 In this study, health-seeking behaviour and treatment outcomes were similar between  
391 the regional and metropolitan settings. These results suggest that existing programs are  
392 functioning well, although the possible trend toward health service delays requires further  
393 monitoring and reviewing opportunities for programmatic strengthening. In addition,  
394 people aged over 64 years are at significantly greater risk of dying from TB and, in  
395 appreciation of this risk, more intensive care may be required.

396 Due to a paucity of research in regional areas of countries with a low incidence of TB, we  
397 cannot make a direct comparison between our study and other published literature. Putting  
398 aside the comparison between regional and metropolitan data, our results in relation to  
399 delays in TB diagnosis and treatment are consistent with other Australian studies as well as  
400 systematic reviews [10,17,18]. For example, Bello et al., [17] performed a systematic review  
401 of 198 studies. They reported a median duration of patient delay of 28 days and a health  
402 system delay of 18 days compared to 21 days for each of these categories for the regional  
403 patients in our study. Of interest, extrapulmonary tuberculosis in our cohort had a much  
404 longer health system delay, averaging 64 days for regional patients.

405

#### 406 Limitations

407 Strengths of this study include the use of a comprehensive central database that includes  
408 important demographic, clinical and laboratory data, allowing for the incorporation of other  
409 factors outlined in this manuscript and a long study period of 25 years. However, we  
410 acknowledge that data for the entire study period are not available for all data fields (e.g.,  
411 treatment outcomes, health system delays), limiting trend analysis. Some of the data in our  
412 study, such as dates of symptom onset and healthcare presentation, were collected  
413 retrospectively from patients and thus may contain inaccuracies relating to recall bias. Data

414 on some factors that could have influenced the treatment delay and outcomes, such as  
415 educational level was limited.

416

## 417 **Conclusion**

418 Tuberculosis in regional Victoria is more common among the overseas-born population,  
419 and patients with extrapulmonary TB in regional areas have non-significant minor delays in  
420 treatment commencement. Increasing migration from high incidence TB countries to  
421 regional settings in Australia requires an ongoing review of available and accessible health  
422 services to limit delays in timely diagnosis and treatment. Increasing access to LTBI  
423 management and enhanced diagnostic pathways in regional areas may assist in reducing the  
424 burden and impact of TB in the future.

425

## 426 **Author Contributions**

427 **Nompilo Moyo:** Conceptualization, Formal analysis, Methodology, Project administration,  
428 Writing – original draft.

429 **Tay EL:** Data curation, Writing – review & editing.

430 **Trauer JM, Burke L, Boyd SC, Singh KP, Jackson J, Commons RJ:** Writing – review & editing.

431 **Denholm JT:** Conceptualization, Supervision, Writing – review & editing.

432

## 433 **Acknowledgements**

434 The authors would like to thank the clinical nurse consultants for collecting and entering  
435 data into the database.

436

437



## 438 **References**

- 439 1. Australian Bureau of Statistics. National, state and territory population. [Internet].  
440 Australian Bureau of Statistics.; 2020 [cited 2020 Nov 30]. Available from:  
441 [https://www.abs.gov.au/statistics/people/population/national-state-and-territory-](https://www.abs.gov.au/statistics/people/population/national-state-and-territory-population/latest-release)  
442 [population/latest-release](https://www.abs.gov.au/statistics/people/population/national-state-and-territory-population/latest-release)
- 443 2. Australian Bureau of Statistics. 2016 Census Community Profiles. [Internet]. Australian  
444 Bureau of Statistics.; 2017 [cited 2020 Nov 30]. Available from:  
445 [https://quickstats.censusdata.abs.gov.au/census\\_services/getproduct/census/2016/co-](https://quickstats.censusdata.abs.gov.au/census_services/getproduct/census/2016/communityprofile/2RVIC?opendocument)  
446 [mmunityprofile/2RVIC?opendocument](https://quickstats.censusdata.abs.gov.au/census_services/getproduct/census/2016/communityprofile/2RVIC?opendocument)
- 447 3. Department of Home Affairs, Australia. Regional migration. [Internet]. Department of  
448 Home Affairs, Australia.; 2020 [cited 2020 Nov 30]. Available from:  
449 <https://immi.homeaffairs.gov.au/visas/working-in-australia/regional-migration>
- 450 4. Trauer JM, Williams B, Laemmle-Ruff I, Horyniak D, Caplice LVS, McBryde ES, et al.  
451 Tuberculosis in migrants to Australia: Outcomes of a national screening program.  
452 *Lancet Reg Health West Pac.* 2021;10:100135–100135.
- 453 5. McBryde ES, Denholm JT. Risk of active tuberculosis in immigrants: effects of age,  
454 region of origin and time since arrival in a low-exposure setting. *Med J Aust.*  
455 2012;197(8):458–61.
- 456 6. Bright, A., Denholm, J., Coulter, C., Waring, J., & Stapledon, R. Tuberculosis  
457 notifications in Australia, 2015-2018. *Commun Dis Intell.* 2020;44:1–39.

- 458 7. World Health Organisation. Strengthening TB surveillance. [Internet]. 2022 [cited 2022  
459 Jun 26]. Available from: [https://www.who.int/westernpacific/activities/strengthening-](https://www.who.int/westernpacific/activities/strengthening-tb-surveillance)  
460 [tb-surveillance](https://www.who.int/westernpacific/activities/strengthening-tb-surveillance)
- 461 8. Australian Bureau of Statistics. 3107.0.55.006 - Information Paper: Population  
462 Concepts, 2008 [Internet]. Australian Bureau of Statistics.; 2008 [cited 2021 Jan 12].  
463 Available from:  
464 [https://www.abs.gov.au/AUSSTATS/abs@.nsf/Lookup/3107.0.55.006Glossary12008?O](https://www.abs.gov.au/AUSSTATS/abs@.nsf/Lookup/3107.0.55.006Glossary12008?OpenDocument)  
465 [penDocument](https://www.abs.gov.au/AUSSTATS/abs@.nsf/Lookup/3107.0.55.006Glossary12008?OpenDocument)
- 466 9. Moyo N, Tay EL, Nolan A, Graham HR, Graham SM, Denholm JT. TB contact tracing for  
467 young children: an Australian cascade of care review. *Public Health Action*.  
468 2021;11(2):91–6.
- 469 10. Dale KD, Tay EL, Trauer JM, Trevan PG, Denholm JT. Comparing tuberculosis  
470 management under public and private healthcare providers: Victoria, Australia, 2002-  
471 2015. *BMC Infect Dis*. 2017;17(1):324–324.
- 472 11. Australian Government Department of Health. Tuberculosis case definition [Internet].  
473 Australian Government Department of Health; 2010 [cited 2022 Apr 12]. Available  
474 from: [https://www1.health.gov.au/internet/main/publishing.nsf/Content/cda-surveil-](https://www1.health.gov.au/internet/main/publishing.nsf/Content/cda-surveil-nndss-casedefs-cd_tb.htm)  
475 [nndss-casedefs-cd\\_tb.htm](https://www1.health.gov.au/internet/main/publishing.nsf/Content/cda-surveil-nndss-casedefs-cd_tb.htm)
- 476 12. VAN WYK SS, ENARSON DA, BEYERS N, LOMBARD C, HESSELING AC. Consulting private  
477 health care providers aggravates treatment delay in urban South African tuberculosis  
478 patients. *Int J Tuberc Lung Dis*. 2011;15(8):1069–76.

- 479 13. Wallace RM, Armstrong LR, Pratt RH, Kammerer JS, Iademarco MF. Trends in  
480 Tuberculosis Reported From the Appalachian Region: United States, 1993-2005. *J Rural*  
481 *Health*. 2008;24(3):236–43.
- 482 14. ABUBAKAR I, CROFTS JP, GELB D, STORY A, ANDREWS N, WATSON JM. Investigating  
483 urban–rural disparities in tuberculosis treatment outcome in England and Wales.  
484 *Epidemiol Infect*. 2007;136(1):122–7.
- 485 15. Toms C, Stapledon R, Waring J, Douglas P. Tuberculosis notifications in Australia, 2012  
486 and 2013. *Commun Dis Intell*. 2015;39(2):E217–35.
- 487 16. Dale KD, Trauer JM, Dodd PJ, Houben RMGJ, Denholm JT. Estimating Long-term  
488 Tuberculosis Reactivation Rates in Australian Migrants. *Clin Infect Dis*.  
489 2020;70(10):2111–8.
- 490 17. Bello S, Afolabi RF, Ajayi DT, Sharma T, Owoeye DO, Oduyoye O, et al. Empirical  
491 evidence of delays in diagnosis and treatment of pulmonary tuberculosis: systematic  
492 review and meta-regression analysis. *BMC Public Health*. 2019;19(1):820–820.
- 493 18. Williams E, Cheng AC, Lane GP, Guy SD. Delays in presentation and diagnosis of  
494 pulmonary tuberculosis: a retrospective study of a tertiary health service in Western  
495 Melbourne, 2011–2014. *Intern Med J*. 2018;48(2):184–93.

496

497

## **Tuberculosis notifications in regional Victoria, Australia: implications for public health care in a low incidence setting**

### **Response to reviewer 2**

**Your feedback 1.** The Methods section still requires revisions. Currently there are sub-sections which are not properly described. For example, the study design sub-section is just one short sentence. I suggest revising this section to include the following sub-sections in this particular order: Data Source, Study Population, Variables, and Statistical Analysis. Under the Data Source sub-section - describe the data source, study design and study setting. Under Study Population sub-section - describe the target population by age, inclusion and exclusion criteria and missing data. Under the Variables sub-section - describe the variables, dependent and independent variables. Under Statistical Analysis sub-section - describe the analyses conducted in the study.

**Our response.** We have organised the methods section under the suggested sub-sections. See revised lines 99 to 167.

### **Response to reviewer 3**

**Your feedback 1:** Lines 30-32: the methods section of the abstract is quite brief missing important details that will help readers to understand the results presented from a survival analysis. Sample size, follow-up, date variables, outcomes, censoring, and statistical analysis issues are missing.

**Our response.** We have amended the abstract, and it now reads, “Background: Regionality is often a significant factor in tuberculosis (TB) management and outcomes worldwide. A wide range of context-specific factors may influence these differences and change over time. We compared TB treatment in regional and metropolitan areas, considering demographic and temporal trends affecting TB diagnosis and outcomes. Methods: Retrospective analyses of data for patients notified with TB in Victoria, Australia, were conducted. The outcomes were treatment delays and treatment outcomes. Multivariable

Cox proportional hazard model analyses were performed to investigate the effect of regionality in the management of TB. Six hundred and eleven (7%) TB patients were notified in regional and 8,163 (93%) in metropolitan areas between 1995 and 2019. Of the 611 cases in the regional cohort, 401 (66%) were overseas-born. Fifty-one percent of the overseas-born patients in regional Victoria developed TB disease within five years of arrival in Australia. Four cases of multidrug-resistant tuberculosis were reported in regional areas, compared to 97 cases in metropolitan areas. A total of 3,238 patients notified from 2012 to 2019 were included in the survival analysis. Patient follow-up was censored at the first visit to the health care facility (Patient treatment delay) and at the initiation of TB treatment (Health system delay). Patient, health system, and treatment delays were similar in regional and metropolitan areas for cases with pulmonary involvement. Cases with extrapulmonary TB in regional areas have a non-significantly longer healthcare system delay than patients in metropolitan (median 64 days versus 54 days, AHR = 0.8, 95% CI 0.6-1.0, P = 0.094).

Conclusion: Tuberculosis in regional Victoria is common among the overseas-born population, and patients with extrapulmonary TB in regional areas experienced a non-significant minor delay in treatment commencement with no apparent detriment to treatment outcomes. Improving access to LTBI management in regional areas may reduce the burden of TB.” Lines 26-49.

**Your feedback 2.** Line 36-39-->the statement in these lines feels like labeling. In the absence of adequate number of cases, it is difficult to associate multidrug resistant TB and being overseas born. Furthermore, a statement in line 36 reads, 'the proportion of MDR-TB cases in regional vs metropolitan areas is similar'. In the next line, however, it presents only four cases of MDR-TB in regional vs 97 in metropolitan. The statements in the lines indicated above are difficult to follow◇present them consistently in terms of proportion or in absolute

numbers. The data presented in Table 1 of the body of the document, do not support this statement. 4 MDR-TB vs 0 in regional and metropolitan--> this data is not adequately powered to support the statement provided in these lines.

**Our response.** We have amended the statement and it now reads “Four cases of multidrug-resistant tuberculosis were reported in regional areas, compared to 97 cases in metropolitan areas.” Lines 37-38.

**Your feedback 3.** Lines 40-44: "Cases with extra pulmonary TB in regional areas have a non-significantly longer healthcare system delay than patients in metropolitan (median 64 days versus 54 days, AHR = 0.8, 95% CI 0.6-1.0, P = 0.094). People living in regional areas have a non-significantly higher odds of dying of TB (AOR = 1.8, 95% CI 0.7-4.2, P = 0.198)."

In the above text, the authors presented mixed effect sizes, AHR vs AOR. However, the effect estimate from the Cox proportional hazards regression is expressed in HRs than ORs. The other thing is that the authors should clearly specify their outcome of interest than generally providing 'TB mgt. outcome'.

**Our response.** We have amended the abstract, please refer to our response 1. Lines 26-49.

**Your feedback 4.** The other thing is that the authors should clearly specify their outcome of interest than generally providing 'TB mgt. outcome'.

**Our response.** We have added the following statement to the abstract and methods sections: “The study outcomes were treatment delays and treatment outcomes”. Lines 31, 144-145.

**Your feedback 5.** While information presented in the background is critical to understand context of the problem, its nature, efforts to reduce the extent of the problem, challenges, gaps, and the need to conduct the current study, it is only presented in 18 lines missing important details. Therefore, I suggest the authors to consider adding a few details to give insight to the problem studied.

**Our response.** Thank you for this suggestion. We have added the following statement: “Understanding TB treatment delays among regional patients provides important insights into Victorian TB programme performance and is a critical step towards tuberculosis elimination. Globally, TB surveillance data have been recognised as an important data source for assessing the disease burden and epidemiological trends in TB (World Health Organization, 2022). Evaluating treatment outcomes and delays in regional areas will inform practice and policy.” Lines 90-95.

**Your feedback 6.** Data analysis- Line 139: consider here too the comments provided in the abstract regarding data analysis. Lines 150-153: present the global test results and also for the independent variables to attest that the proportional hazard regression was met.

**Our response.** We have amended the data analysis, and it now reads: “Descriptive and multivariable analyses were performed. Incidence rates were calculated using the mid-year estimated resident population. Pearson’s  $\chi^2$  test was used to test the association between categorical variables. A two-tailed p-value of  $<0.05$  was considered statistically significant. In logistic regression, we compared complete treatment with death, irrespective of the cause, lost to follow-up and transferred interstate or overseas. Died of TB was compared with completed treatment, lost to follow-up, died of other causes during treatment for TB, and transferred interstate or overseas. We included all independent variables in all multivariable analyses because we believed they could all affect the outcomes. However, our variable of interest was regionality. The proportional-hazards assumption was assessed using Kaplan-Meier survival curves by including time-dependent covariates in the model and with Schoenfeld residuals. In cases where proportionality assumptions were not met, analyses were stratified. Kaplan-Meier survival curves were used to show various delays in presentation, diagnosis, and treatment between regional and metropolitan cohorts, and Cox proportional hazard analyses were performed to assess these delays. Patient follow-up was censored, 1. at the first visit to a health care facility (Patient treatment delay), 2. at the initiation of TB treatment (Health system delay), 3. at the time a chest x-ray was performed (Diagnostic delay), 4. at the treatment initiation (Treatment initiation delay). Because of limited previous data, analyses of treatment outcomes were conducted using data from

2005 to 2019, while analyses of treatment delays used data from 2012 to 2019.” Lines 190-210.

**Your feedback 7.** Results- Line 158: the 7% and 93% reported cases of TB do not reflect that 45 cases did not have residential information regarding their affiliation to regional or metropolitan.

**Our response:** We have amended this statement, and now it reads; “A total of 8,819 TB cases were notified to the Victorian Government Department of Health between 1995 and 2019. Among the 8,819 cases, 611 (7%) were recorded in regional areas, 8,163 (93%) in metropolitan areas of Victoria and 45 (1%) had neither regional nor metropolitan residential addresses (see Fig 1). Forty-five cases with no residential addresses were excluded from the study as they were classified as neither regional nor metropolitan.” Lines 215-219.

**Your feedback 8.** Line 164-65: it is good to present the number of cases excluded. Or preferably provide the progress of pts. in a flow diagram.

**Our response.** Thank you for this suggestion. We have now provided the flow of patients through the study, see Fig 1. Line 224.

**Your feedback 9.** Line 175-177: this result has not been well reflected in the abstract.

**Our response.** Lines 175-177 were referring specifically to issues related to missing data. However, the abstract has been amended to more clearly reflect the overall findings as outlined above. Lines 26-49.

**Your feedback 10.** Table 1: the font size of contents of the table is significantly different from the text in the body.

**Our response.** We have increased the font size on all tables to 11 points.



**Your feedback 11.** The authors also consider avoiding in places where the total add to hundred or cell values added to the sample in respective subgroup. Or consider using '0' or NA to represent 'not available'

**Our response.** The tables have been amended accordingly.

**Your feedback 12.** Discussion- Owing to the arrival of overseas born individuals from high TB burden countries to Australia, there could be an active search for TB among this particular group which may introduce a diagnostic suspicion bias. Was there an effort in this study to exclude that diagnostic suspicion bias was not an issue or was there an effort to reduce it if there was any?

**Our response.** Thanks for raising this point, which we agree may be important in many contexts. We do not believe that this is a significant issue in our study, as the considerable majority of migration-associated testing for TB an active case finding occurs prior to visa issuing in countries of origin and are thus not reflected in these TB cases presented here. Overall, then, we do not account further for diagnostic suspicion bias during the study period.

## **Reference**

World Health Organisation. (2022). Strengthening TB surveillance. World Health Organisation. <https://www.who.int/westernpacific/activities/strengthening-tb-surveillance>
